# Supplementary material for: N-heterocyclic carbene–palladium(ii)-1-methylimidazole complex catalyzed α-arylation reactions of tetralones with aryl chlorides and further transformation of the products
Source: Royal Society of Chemistry journal article supplement (doi:10.1039/c5ob01203a), 2015-01-01

# Supporting Information

## ***N*-Heterocyclic Carbene-Palladium(II)-1-Methylimidazole Complex Catalyzed Reactions of Tetralones with Aryl Chlorides and Further Transformation of the Products**

Hui-Ying Yin, Xia-Li Lin, Shu-Wan Li and Li-Xiong Shao\*

College of Chemistry and Materials Engineering, Wenzhou University, Chashan  
University Town, Wenzhou, Zhejiang Province, 325035 People's Republic of China

Fax: (+86)-577-86689300, E-mail: [Shaolix@wzu.edu.cn](mailto:Shaolix@wzu.edu.cn)

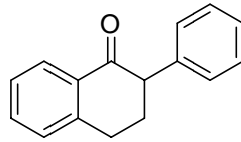

4a

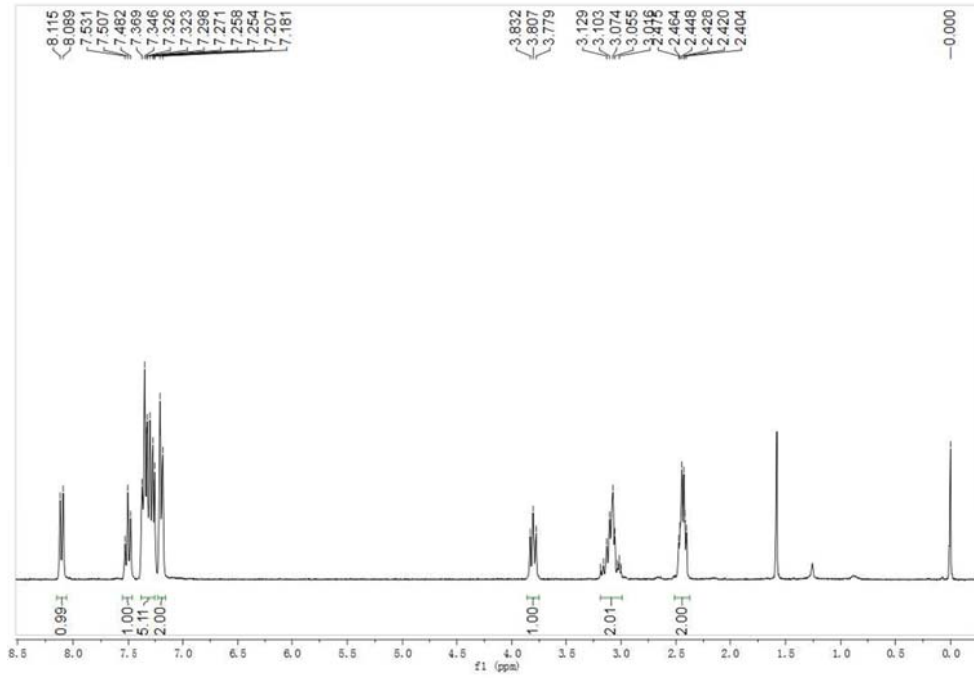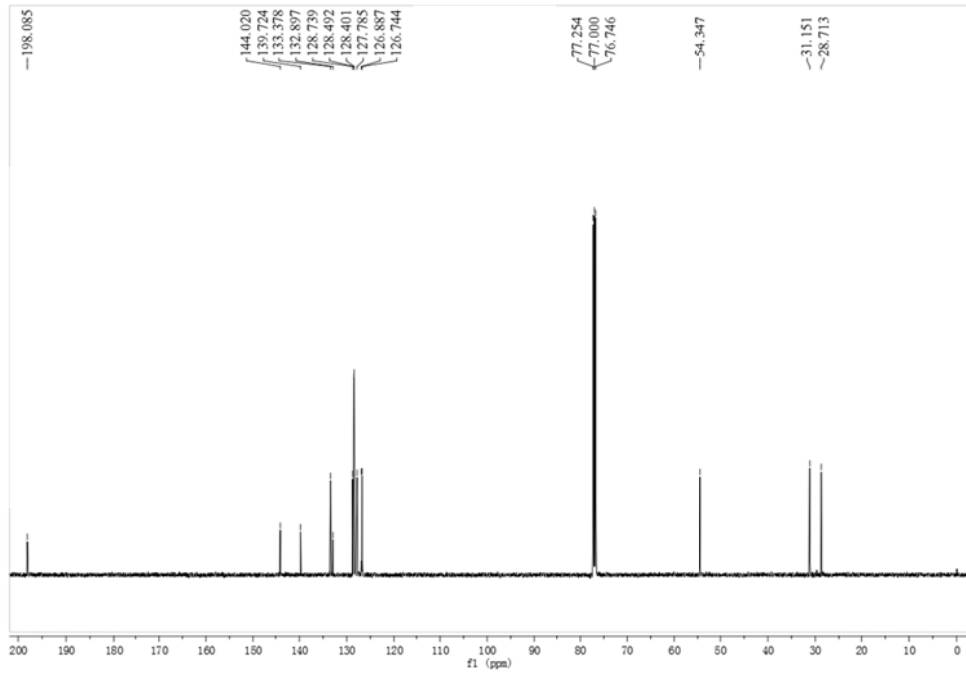

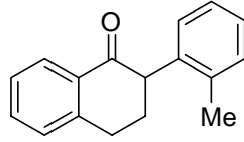

**4b**

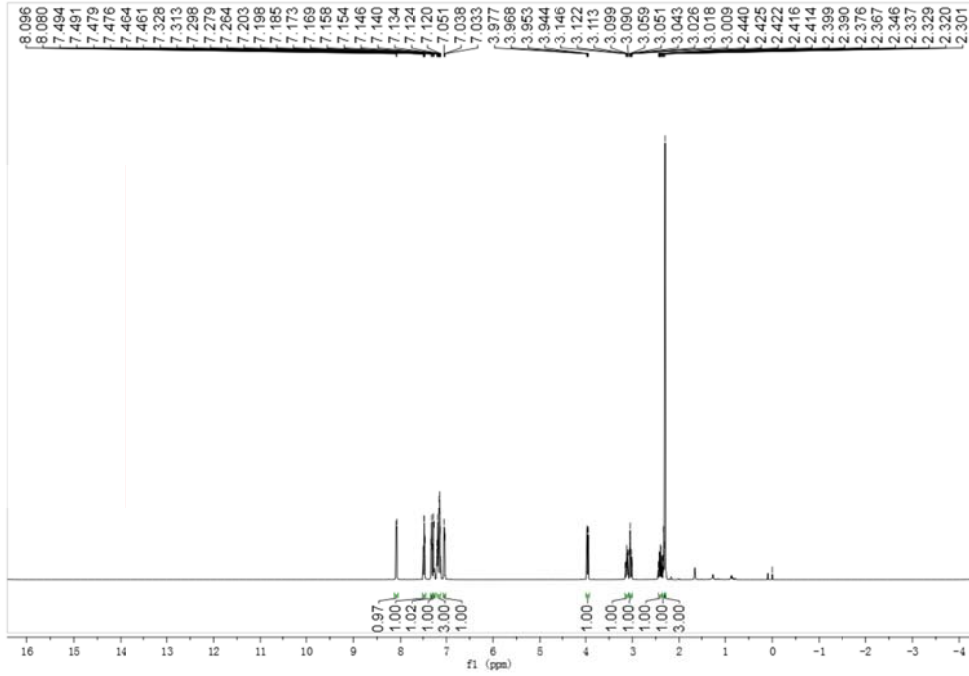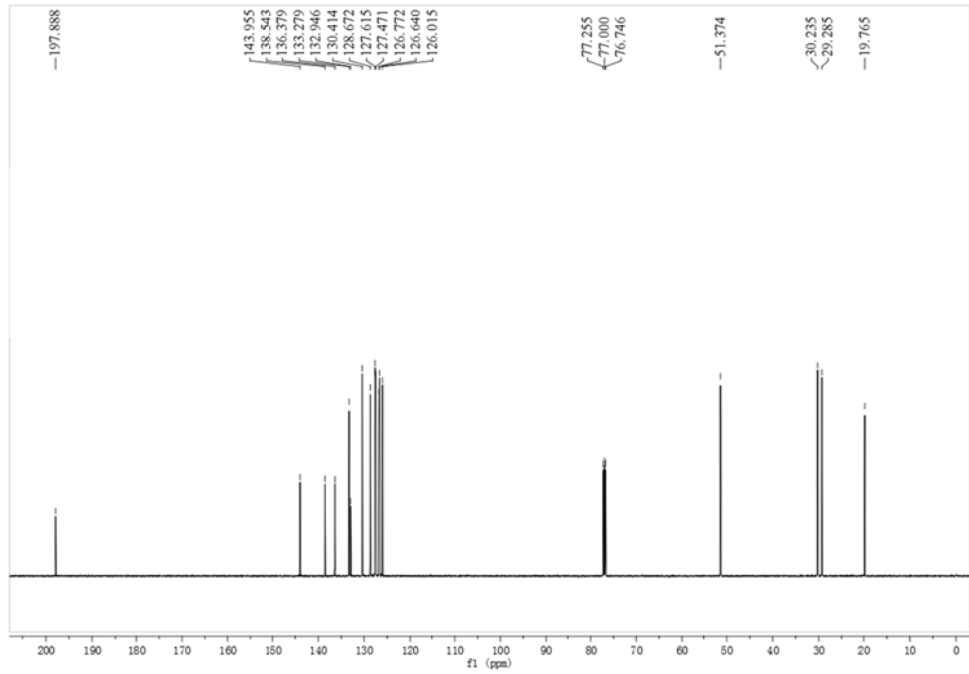

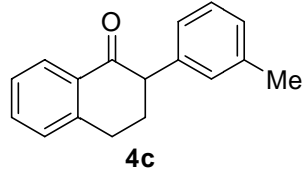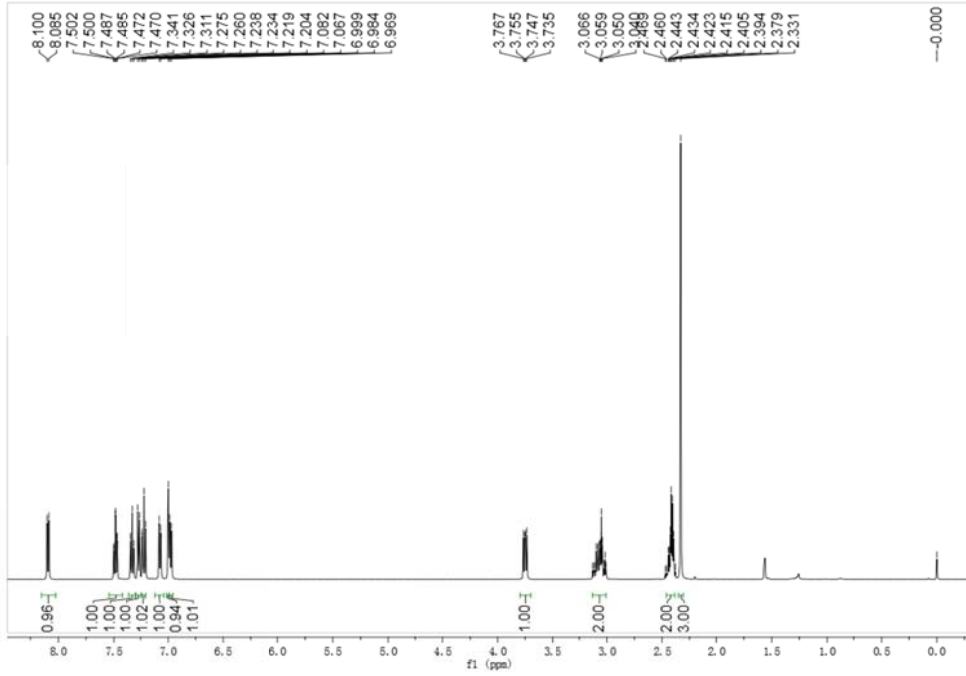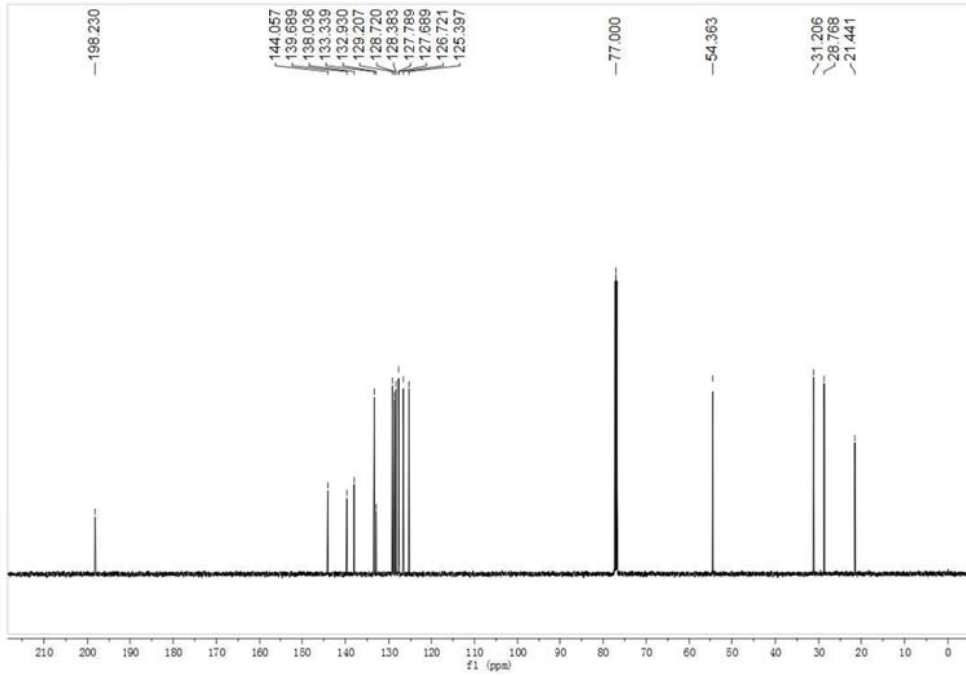

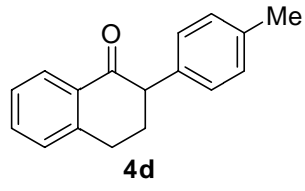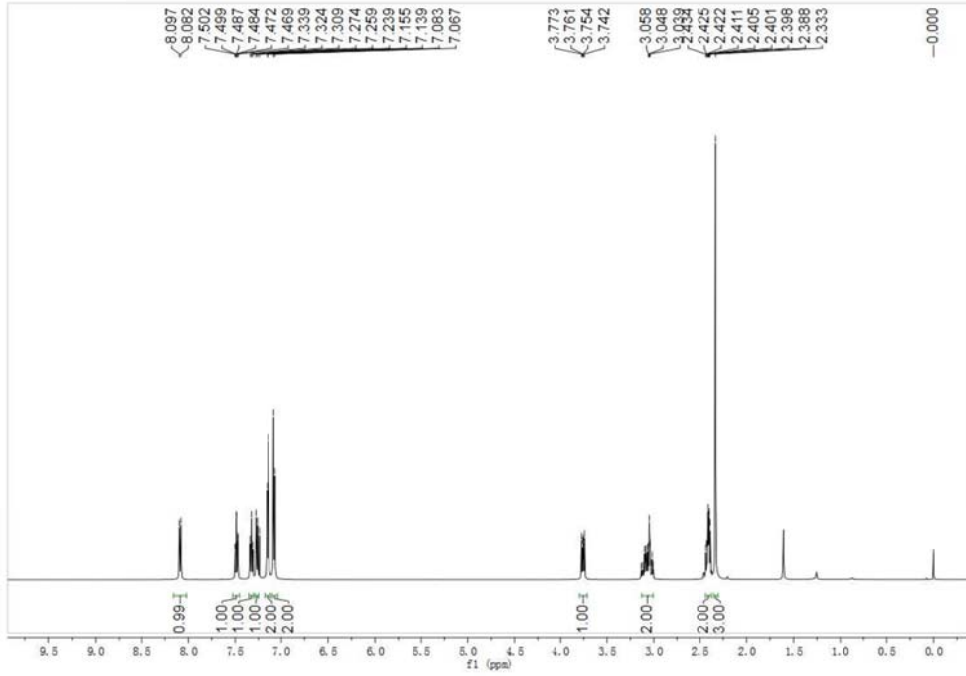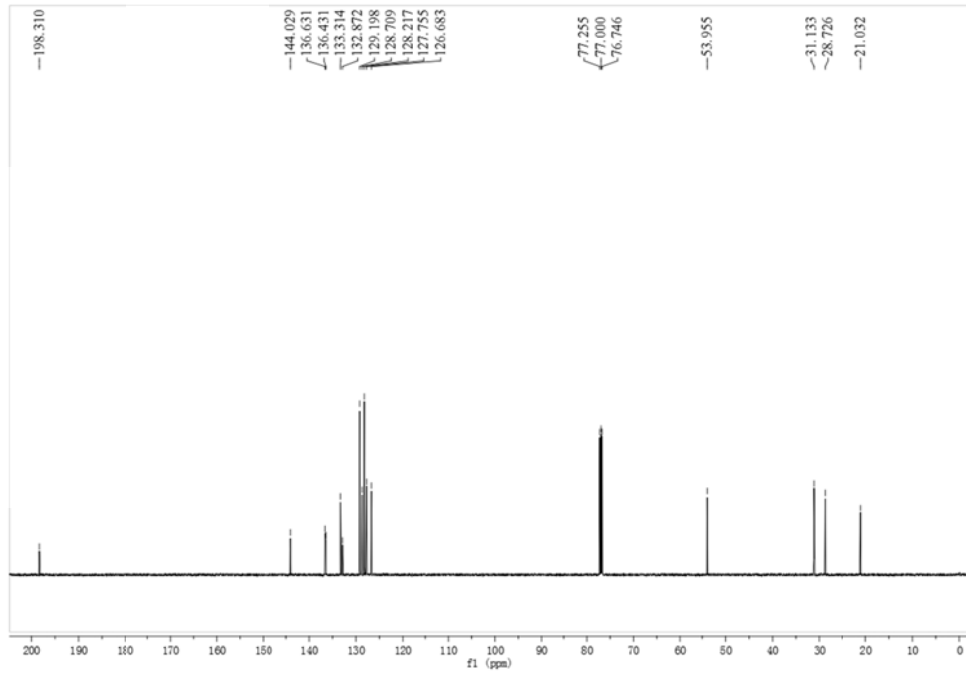

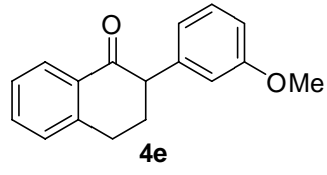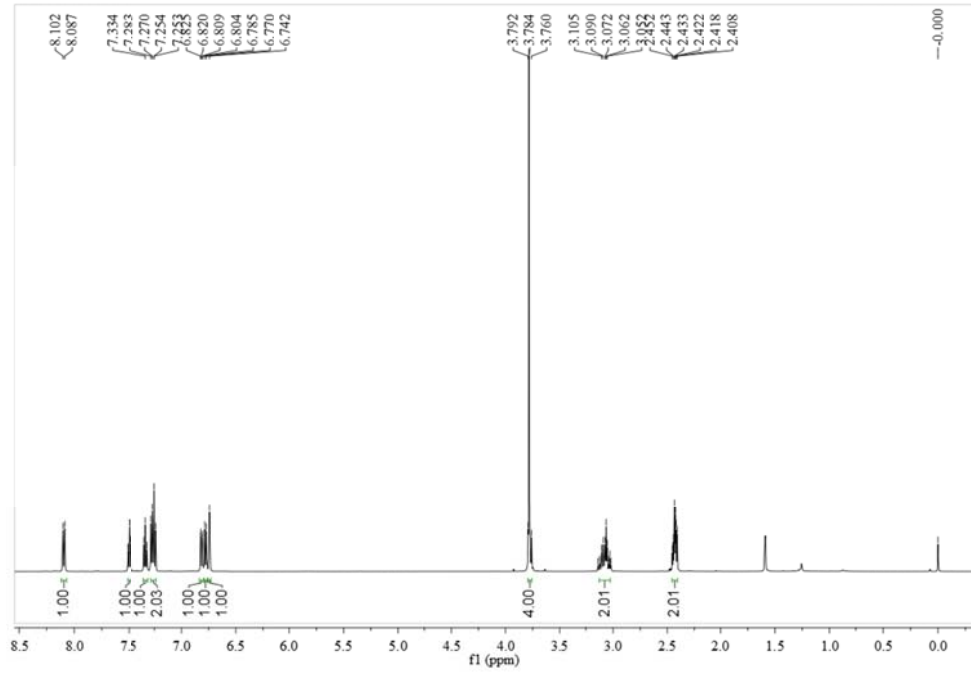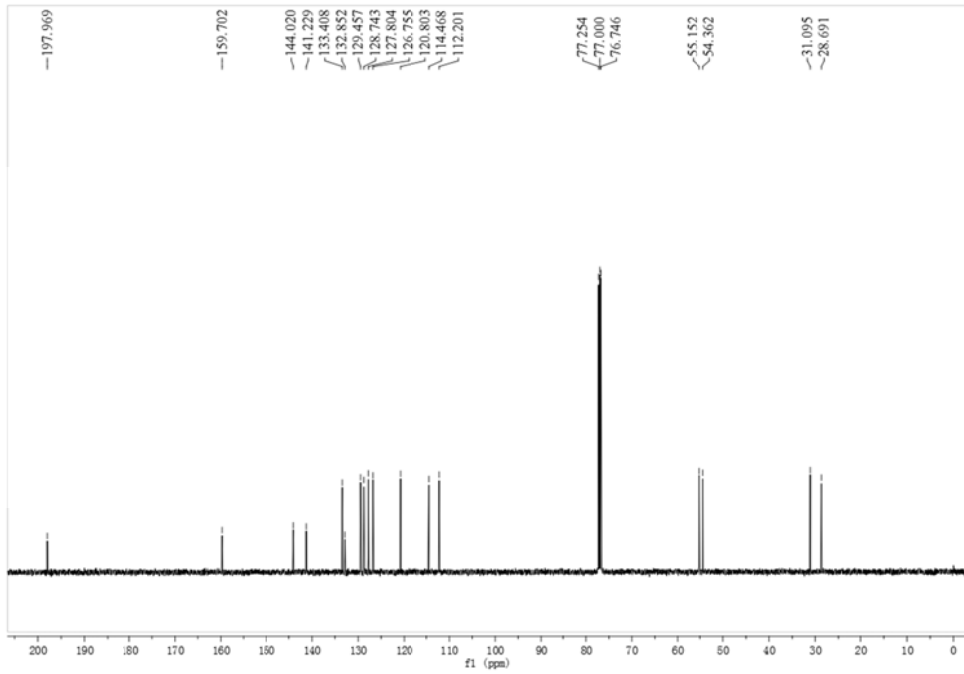

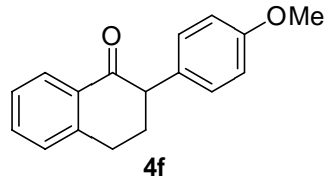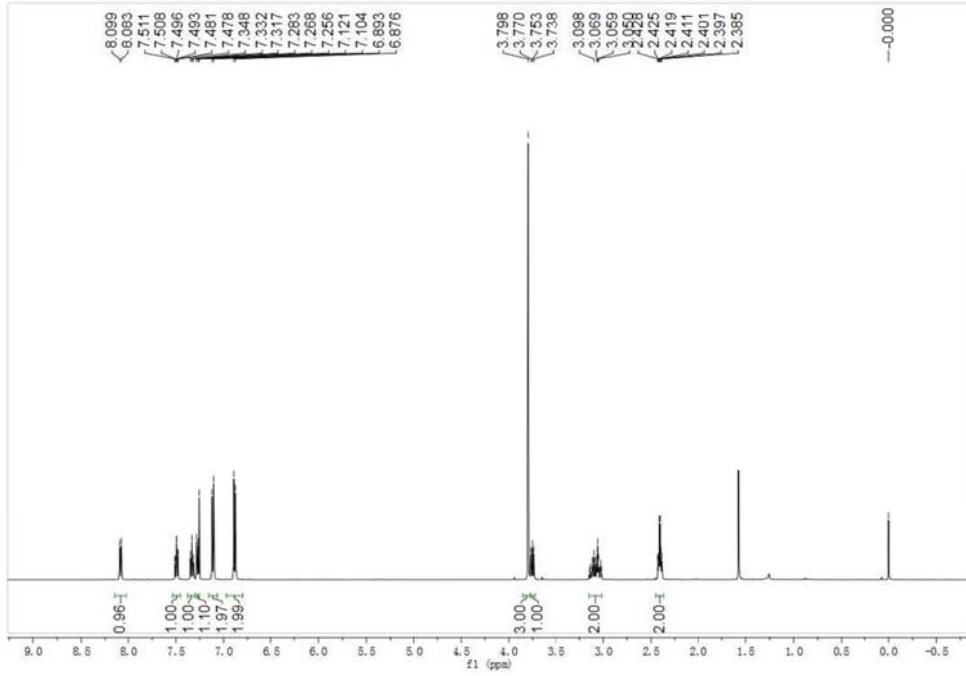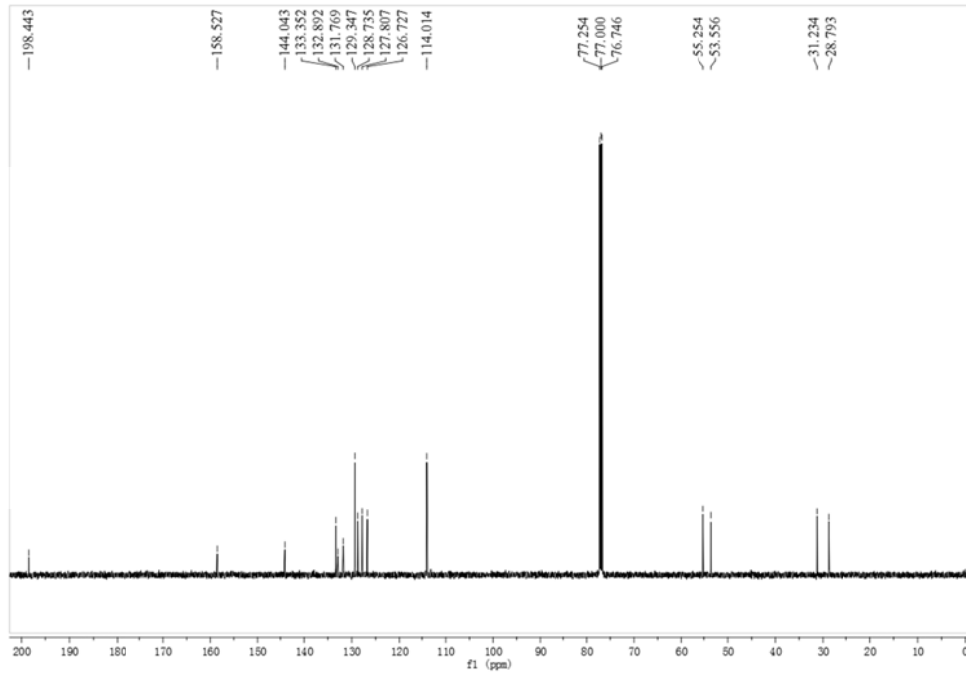

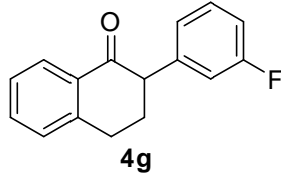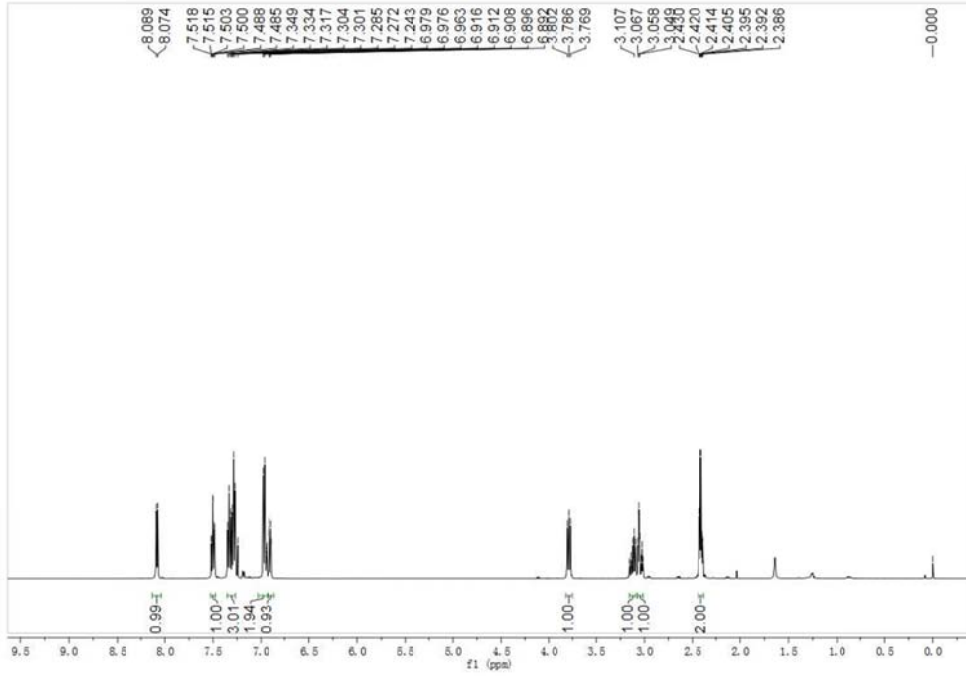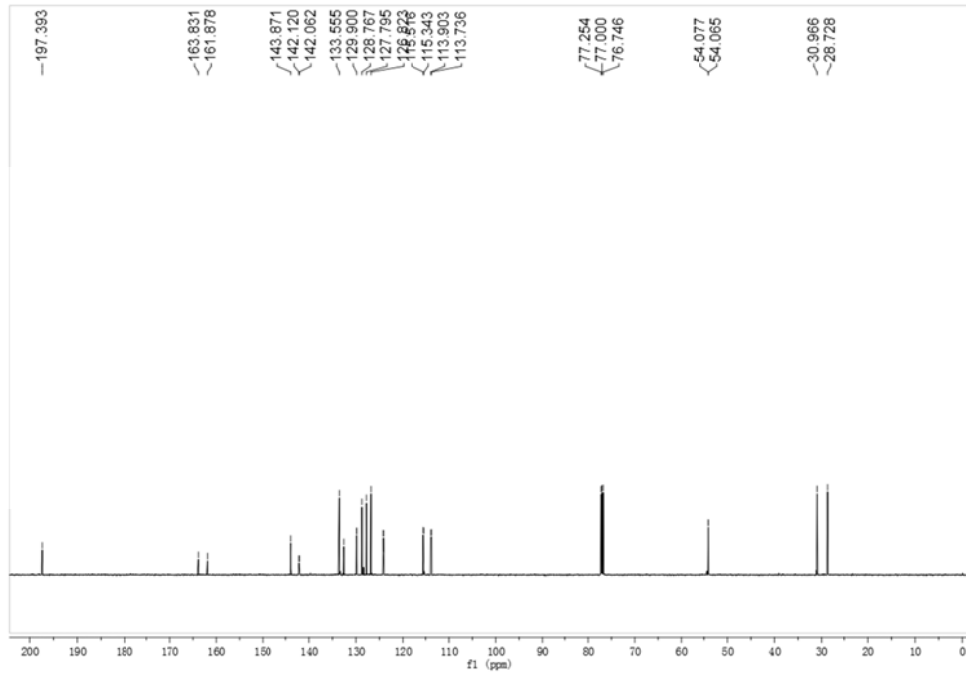



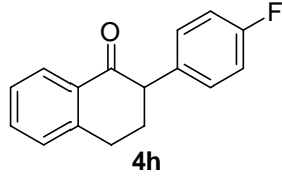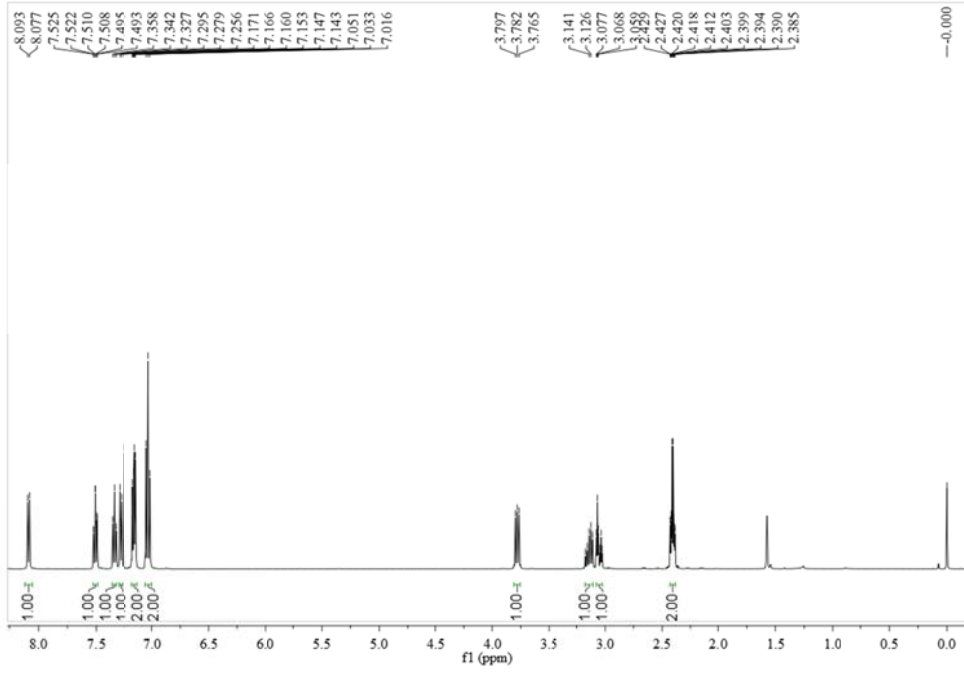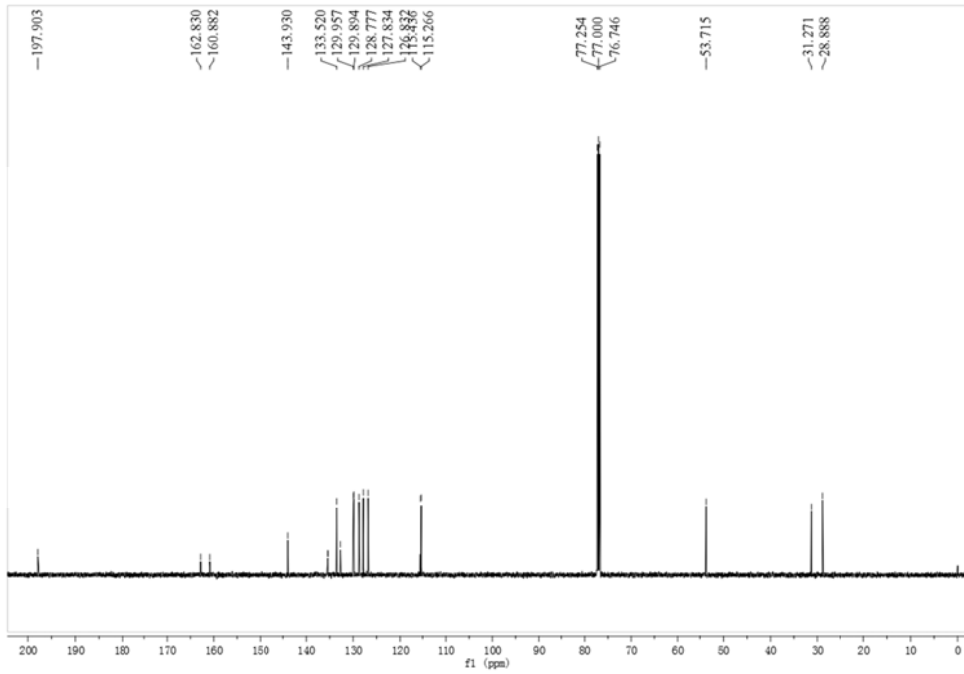

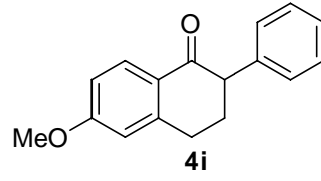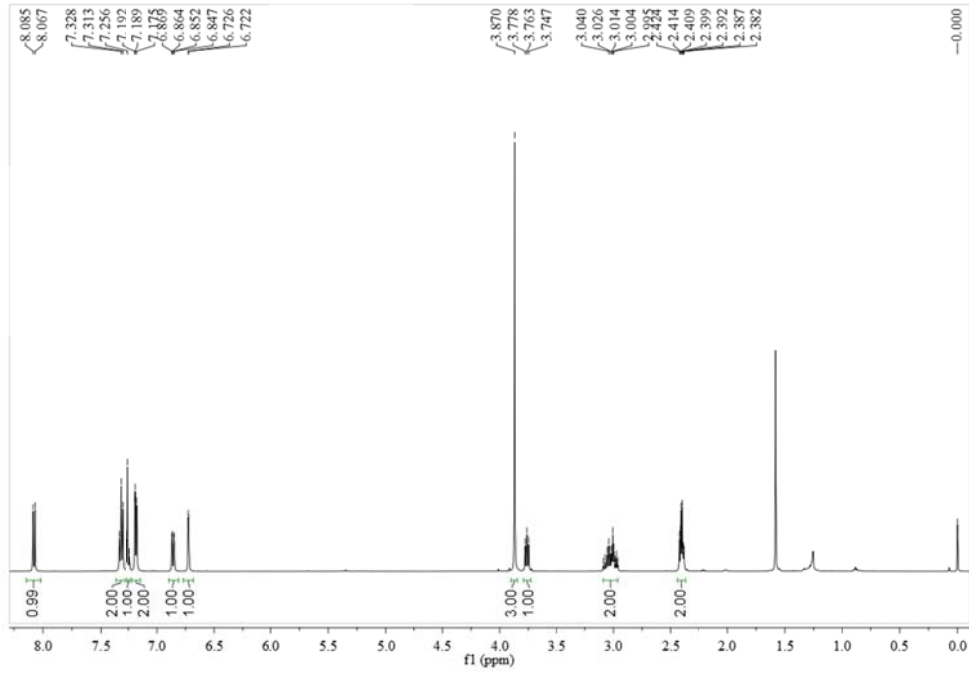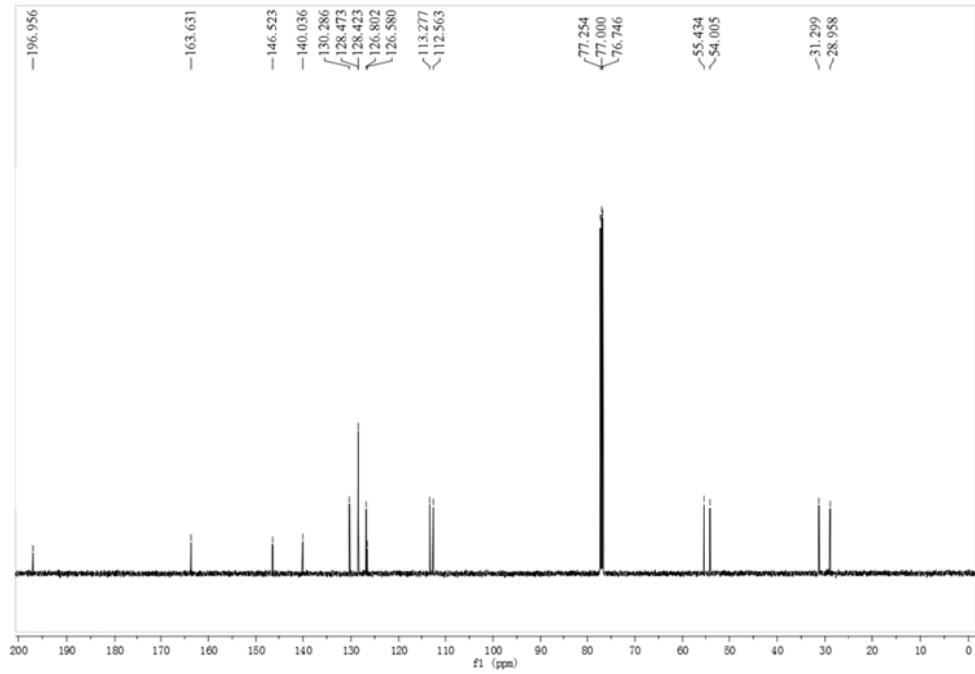

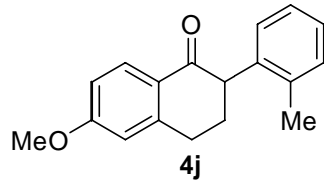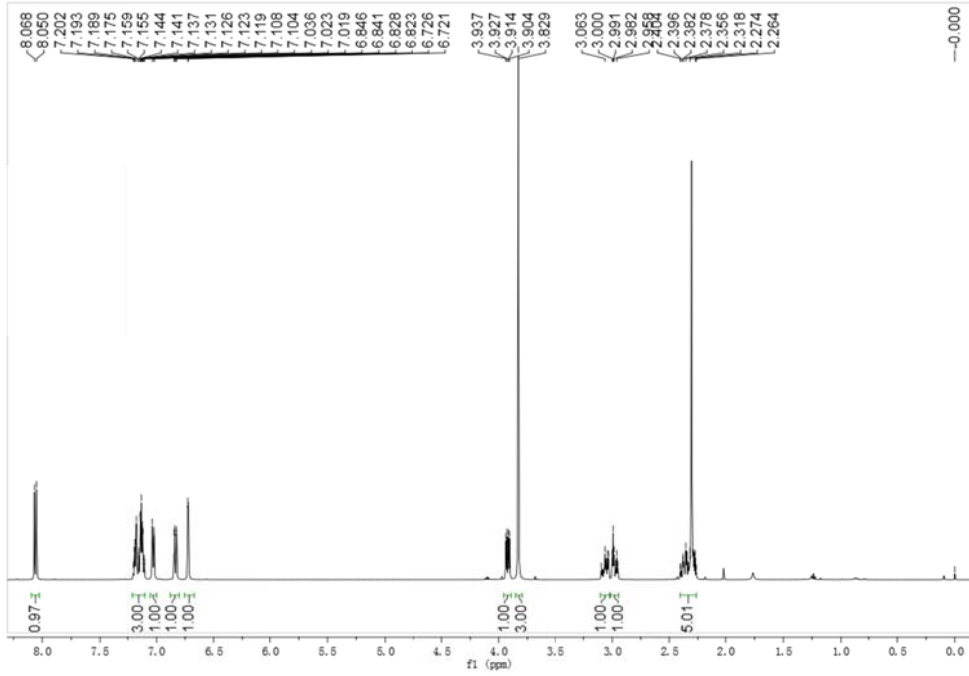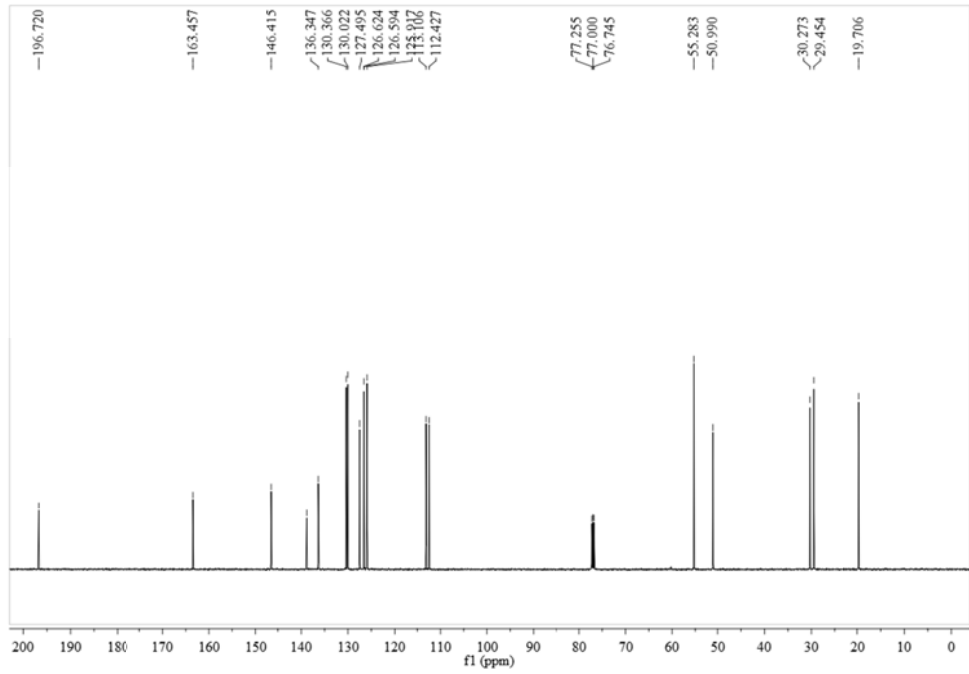

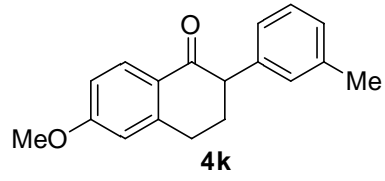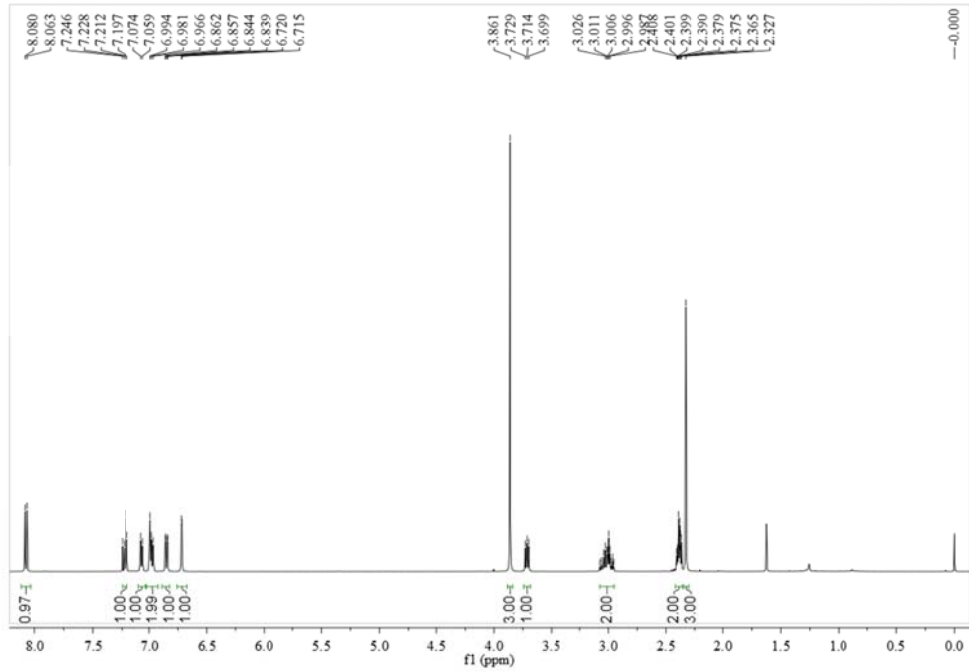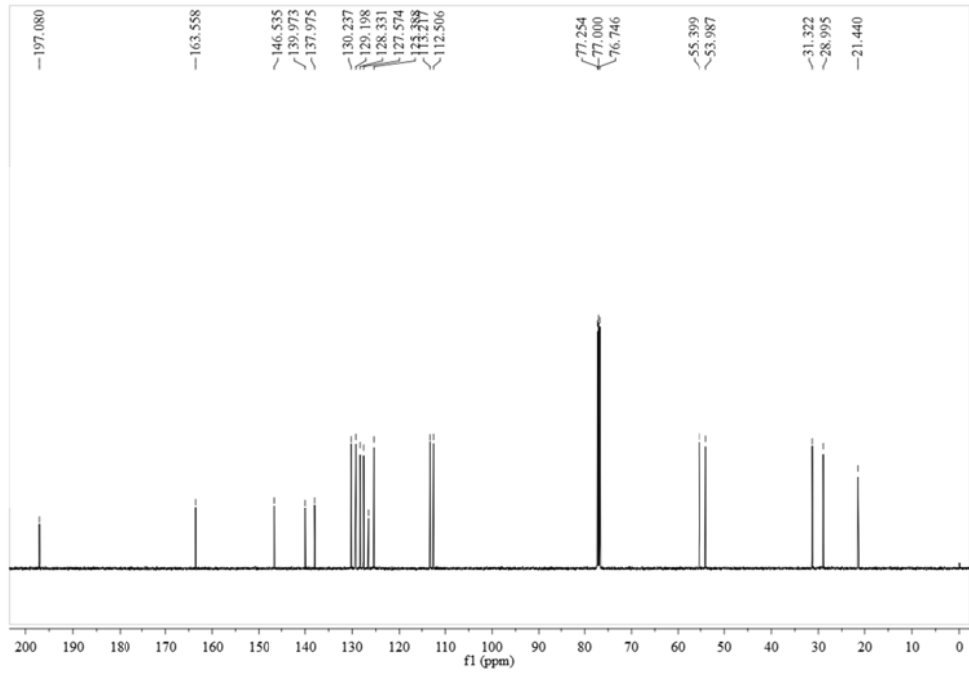

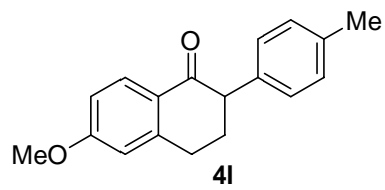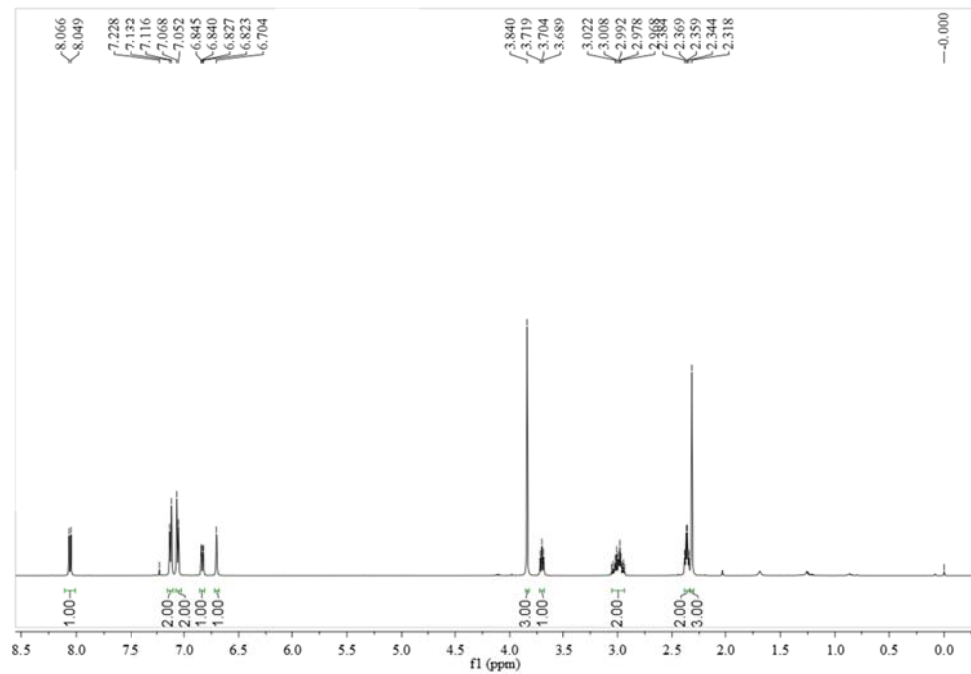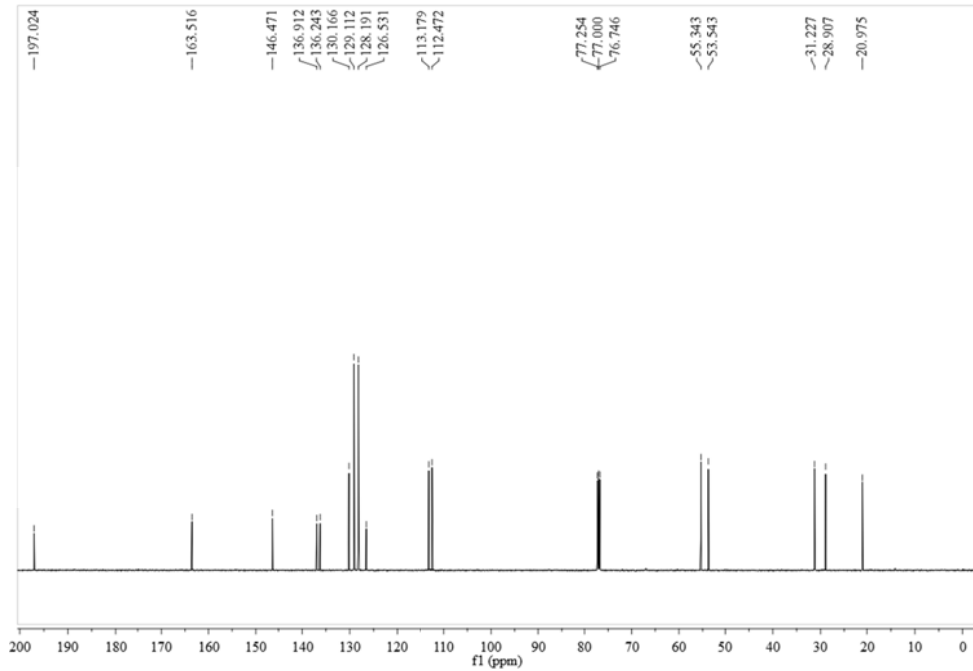

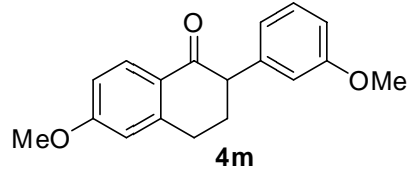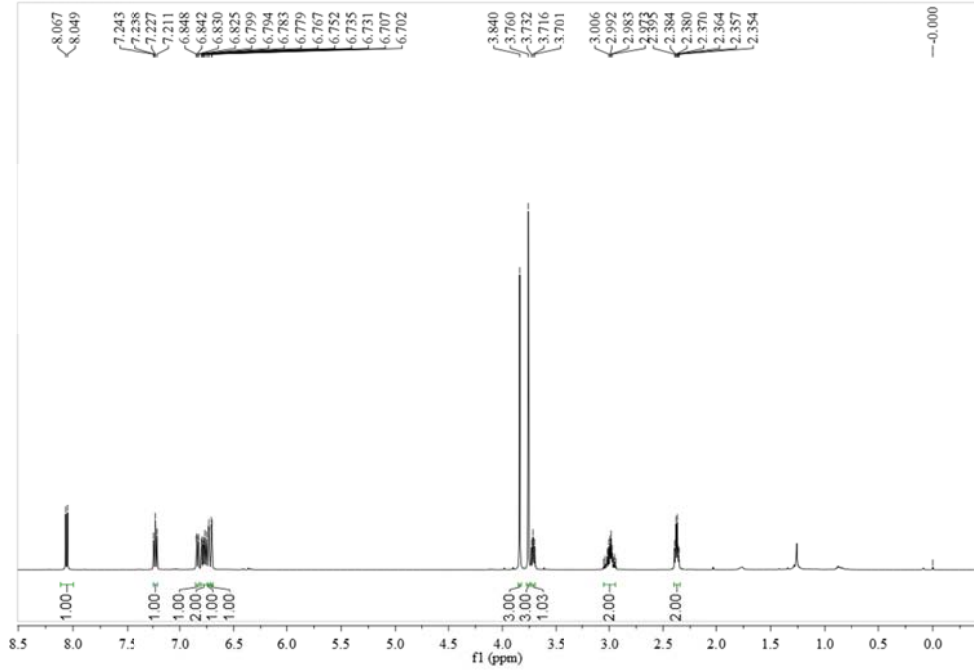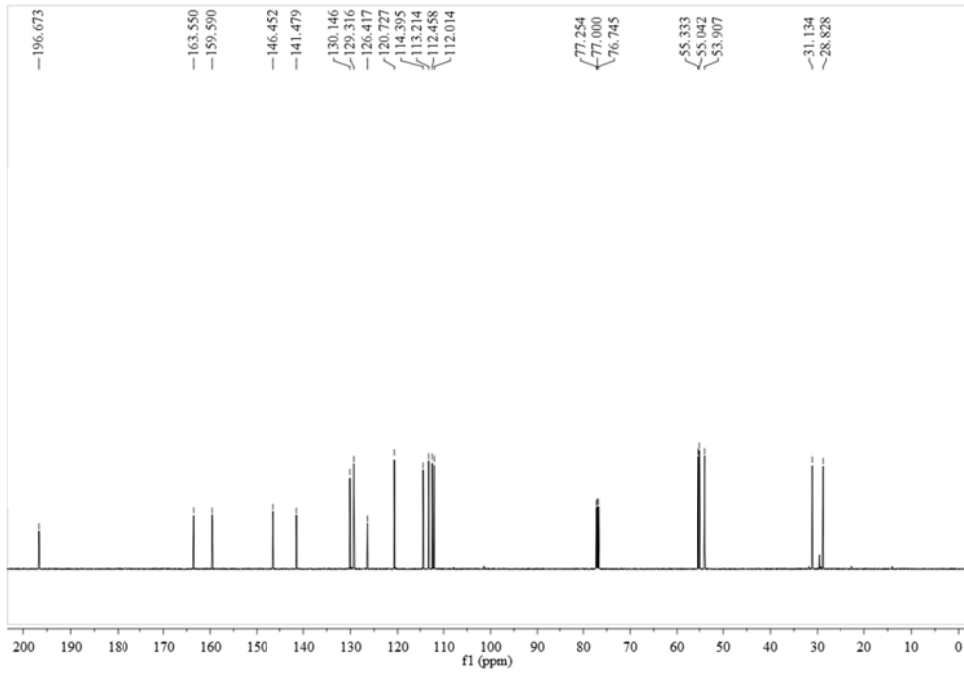

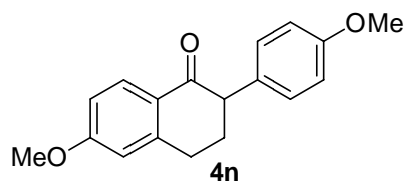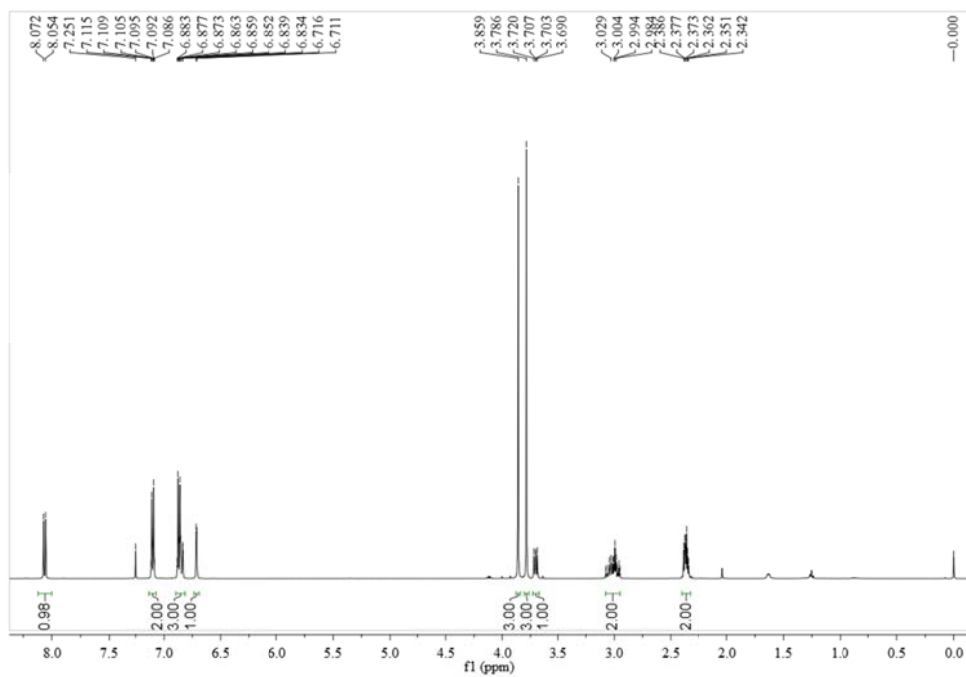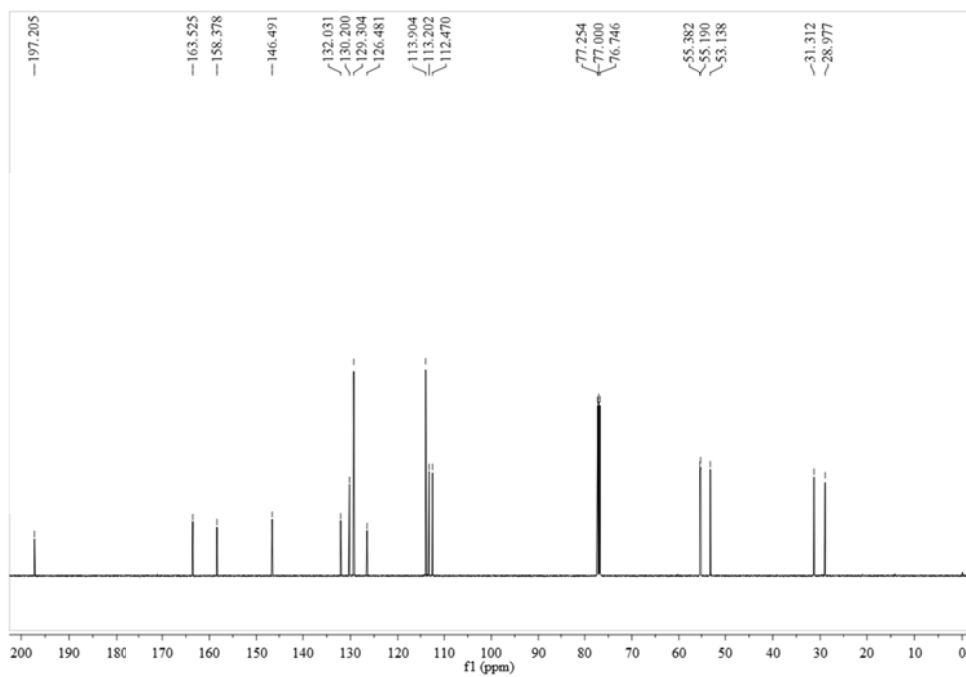

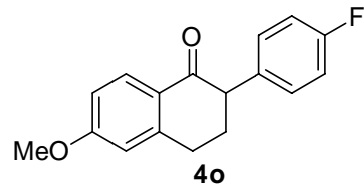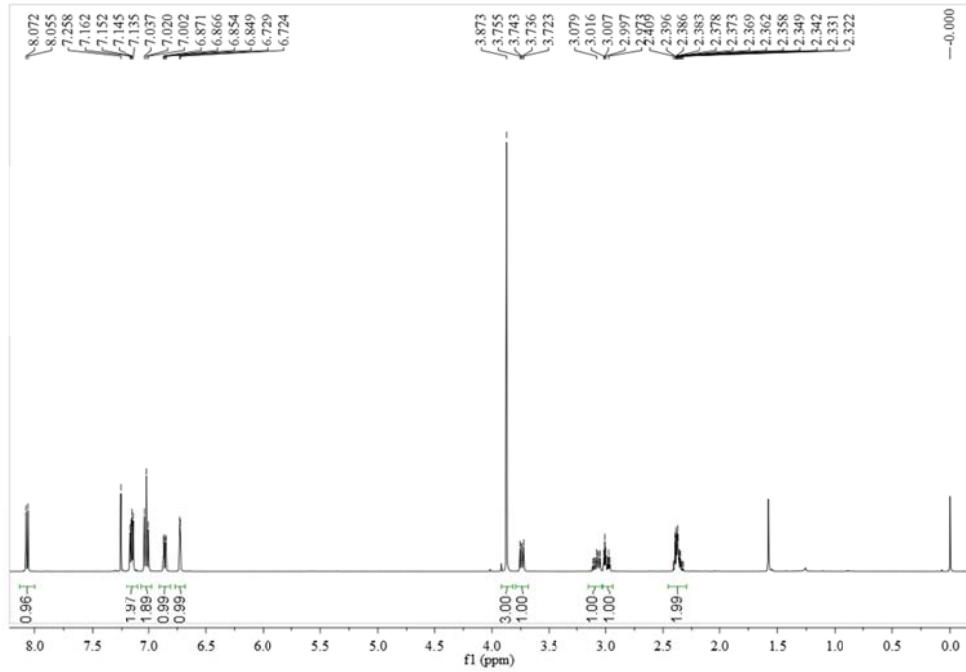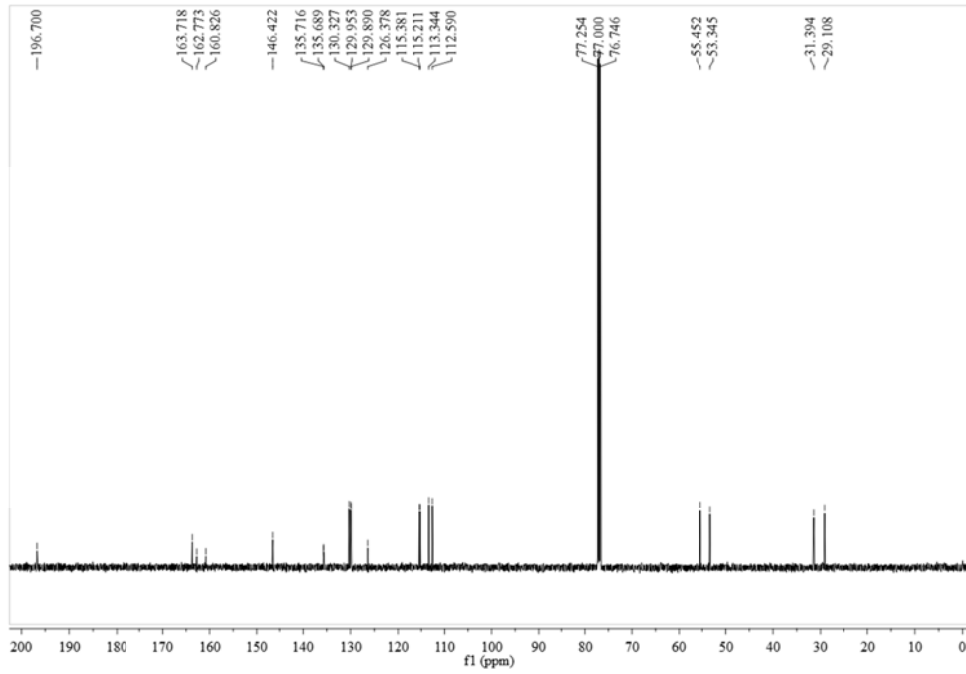



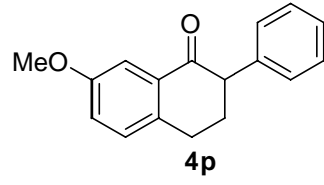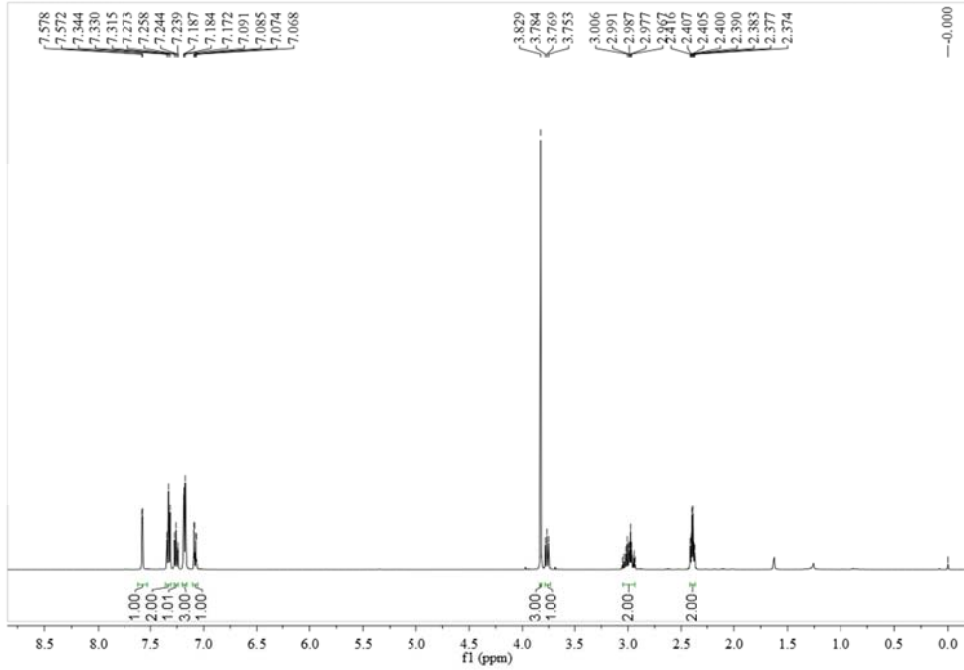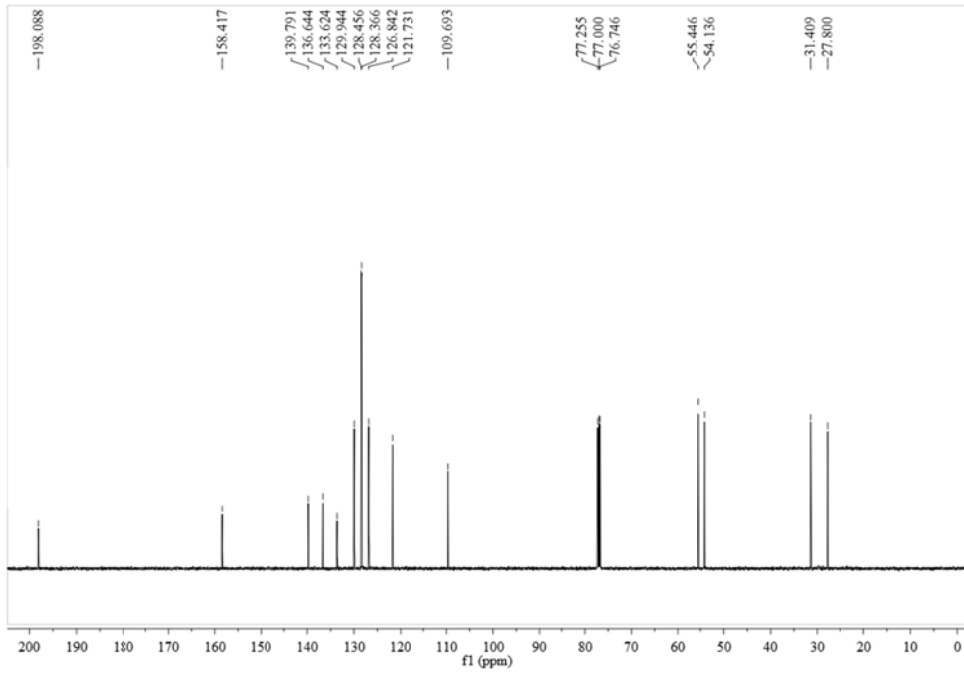

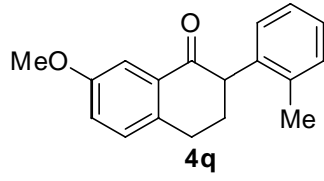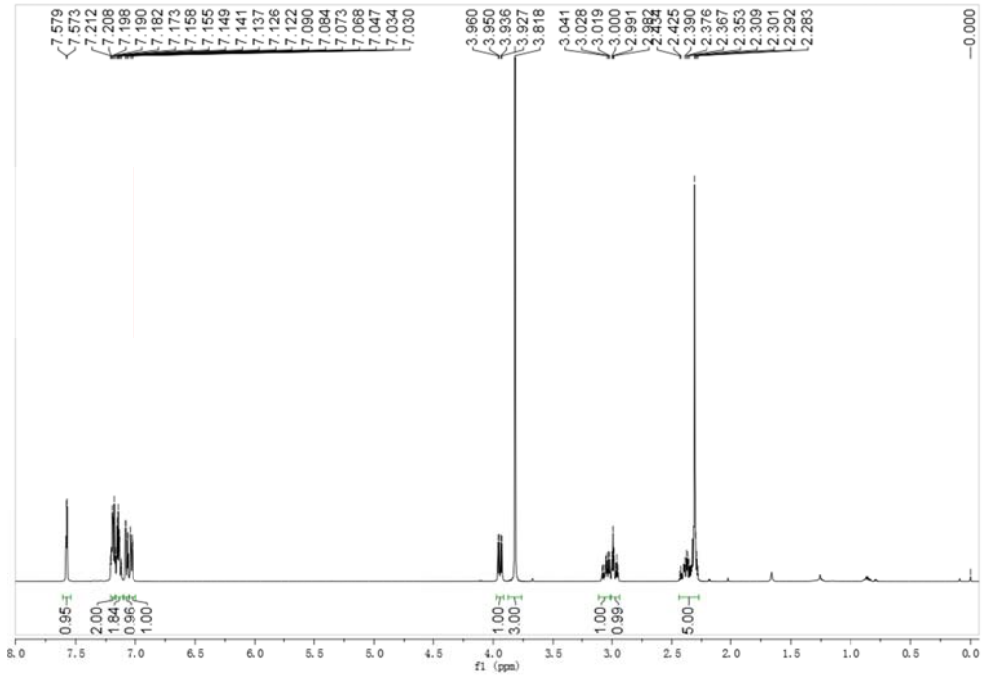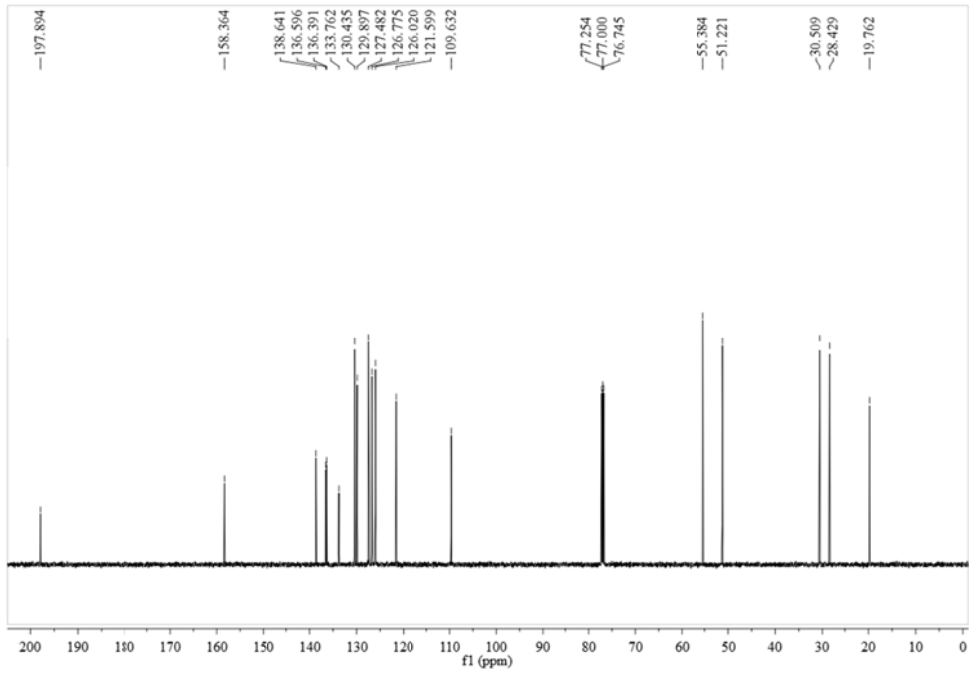

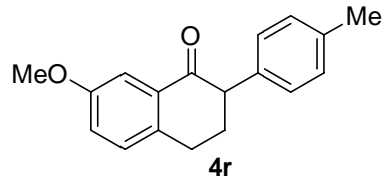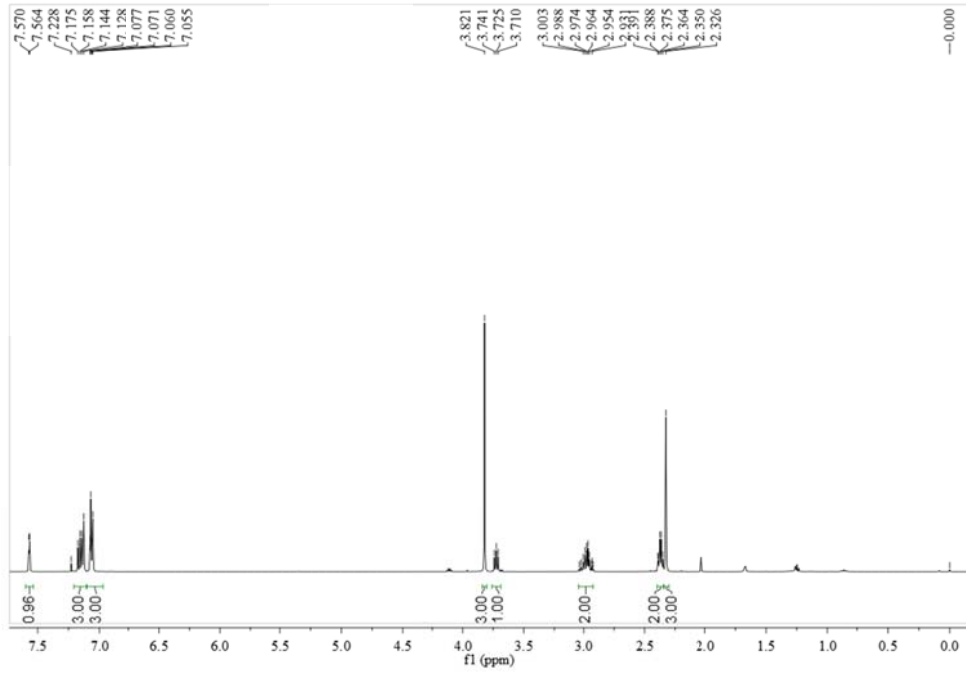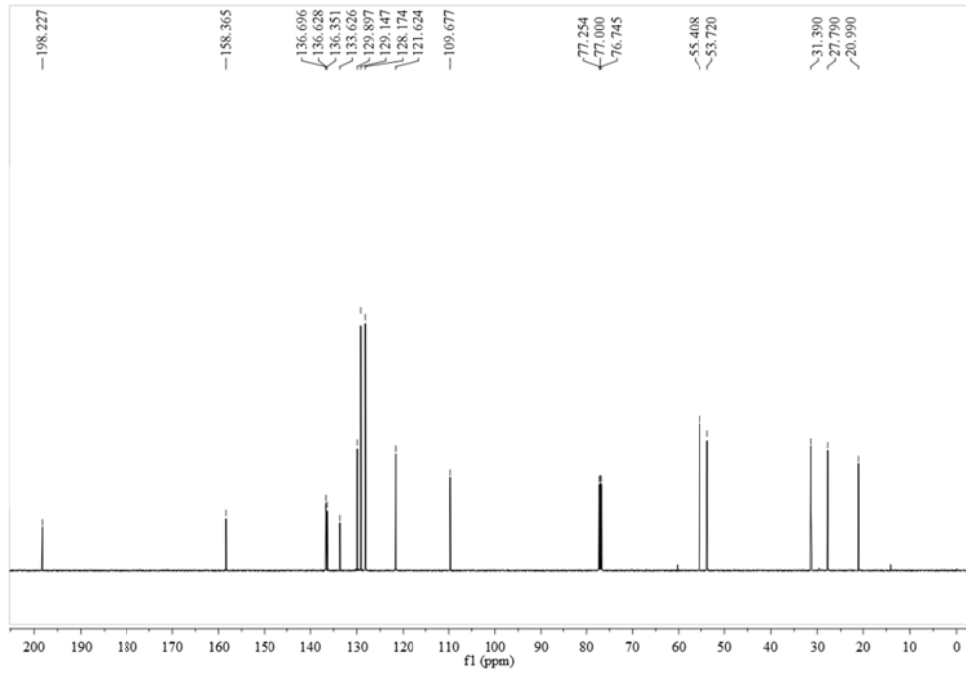

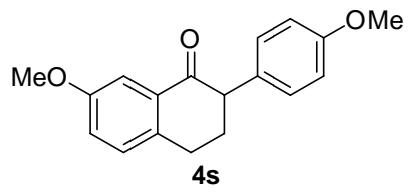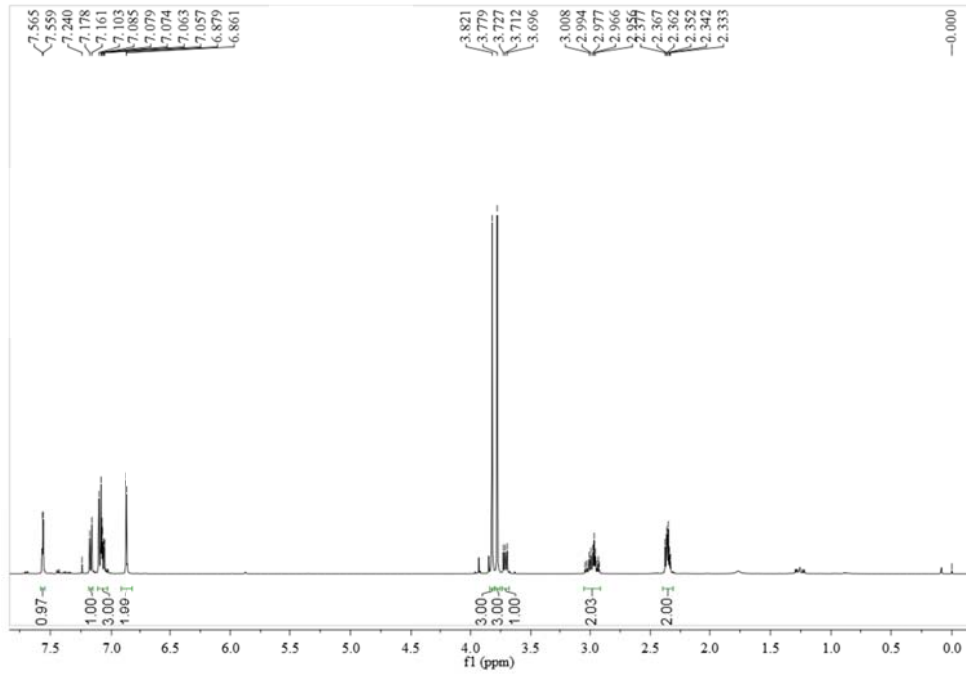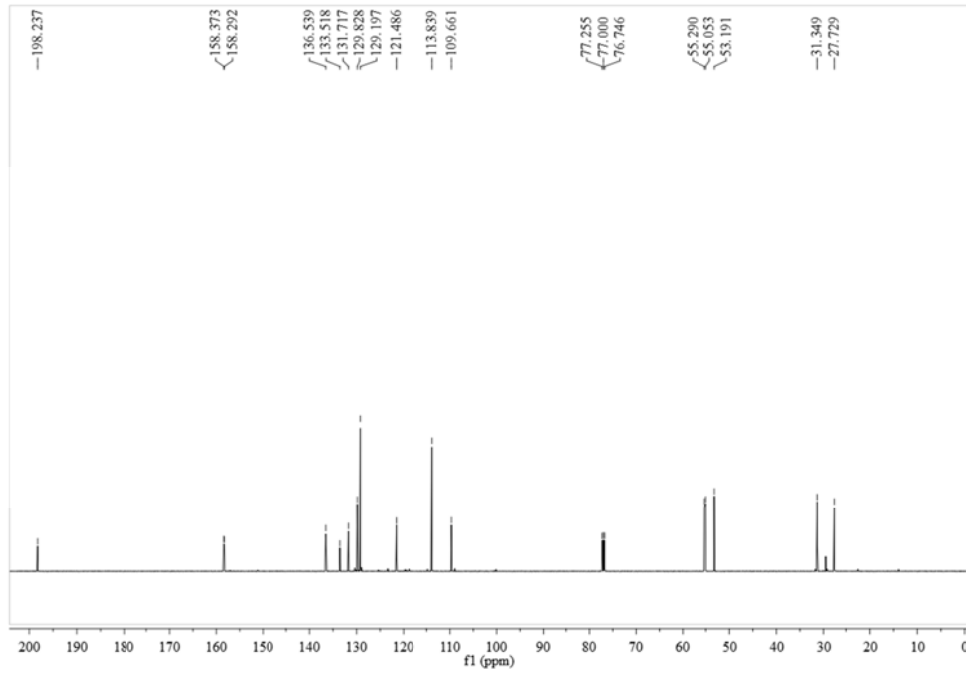

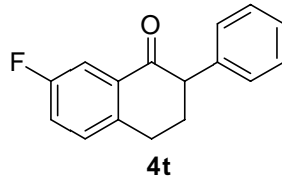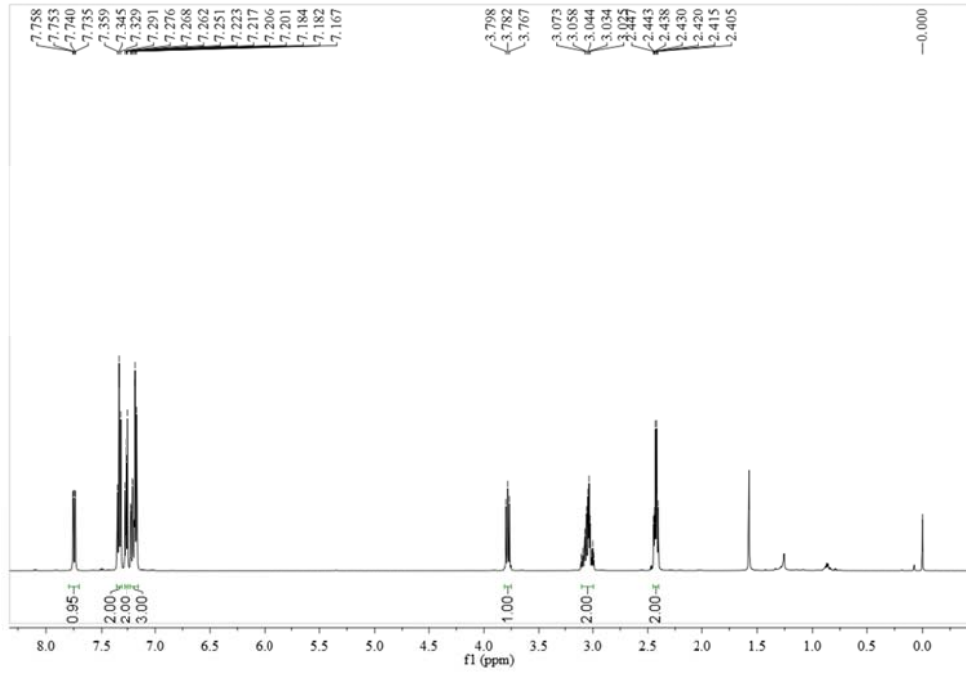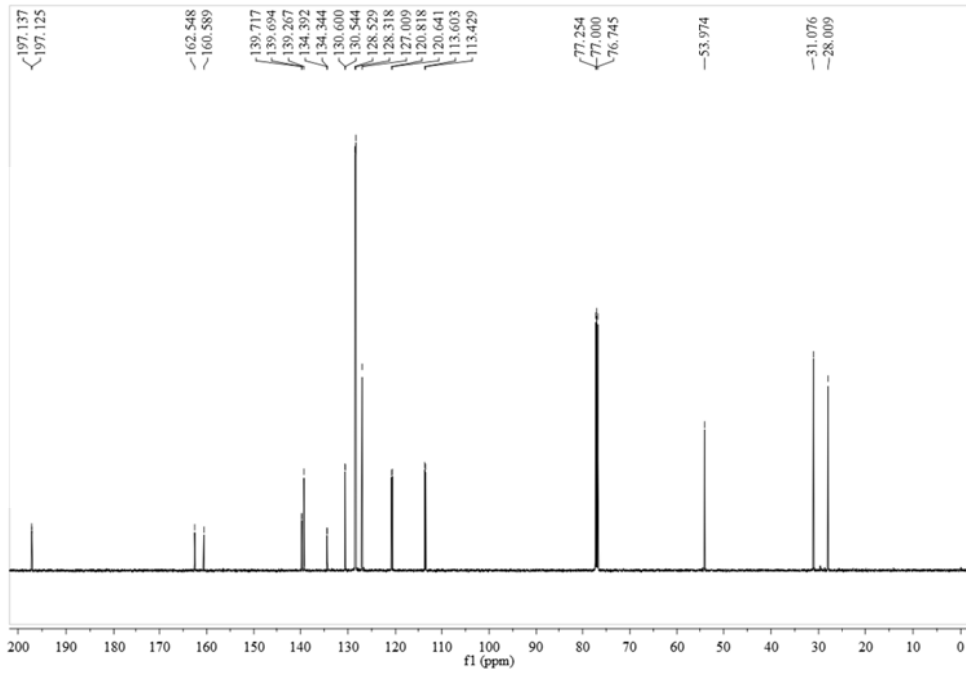

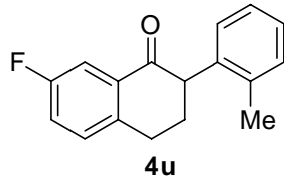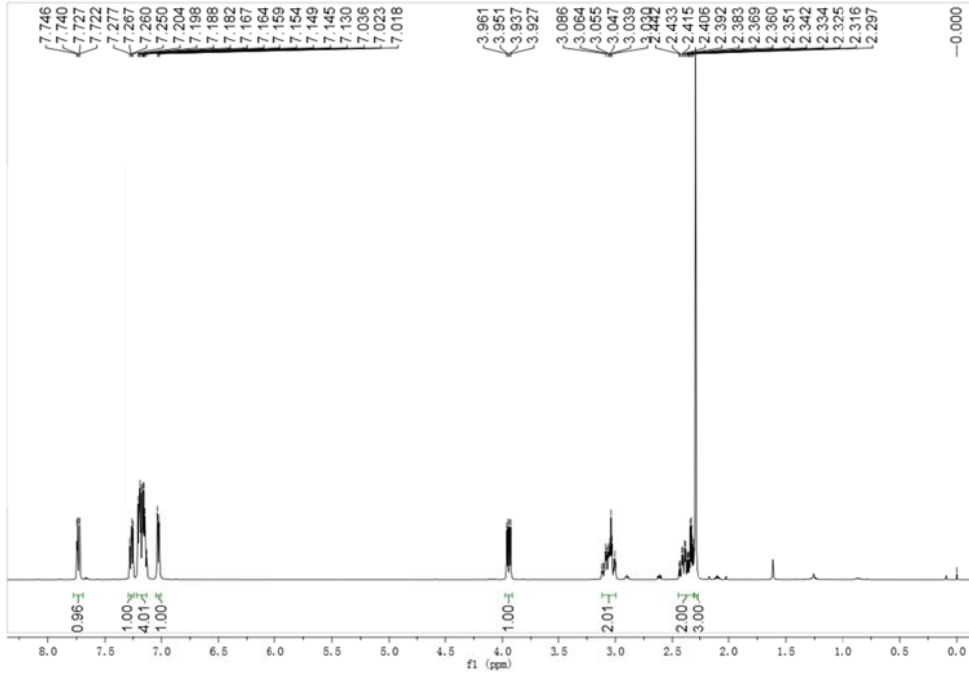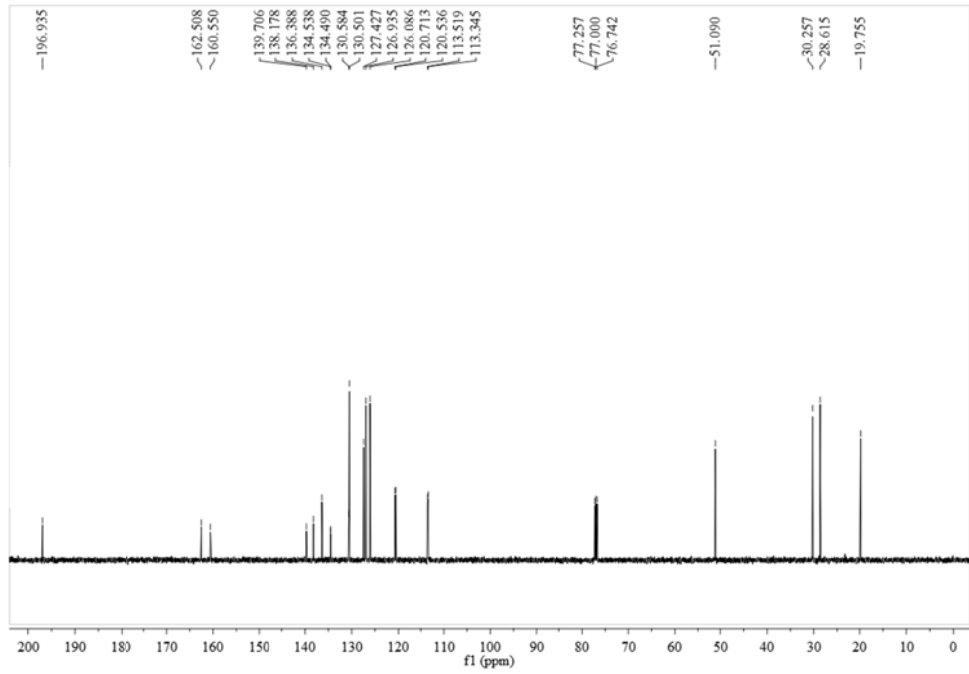

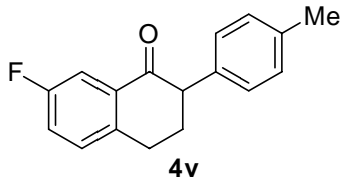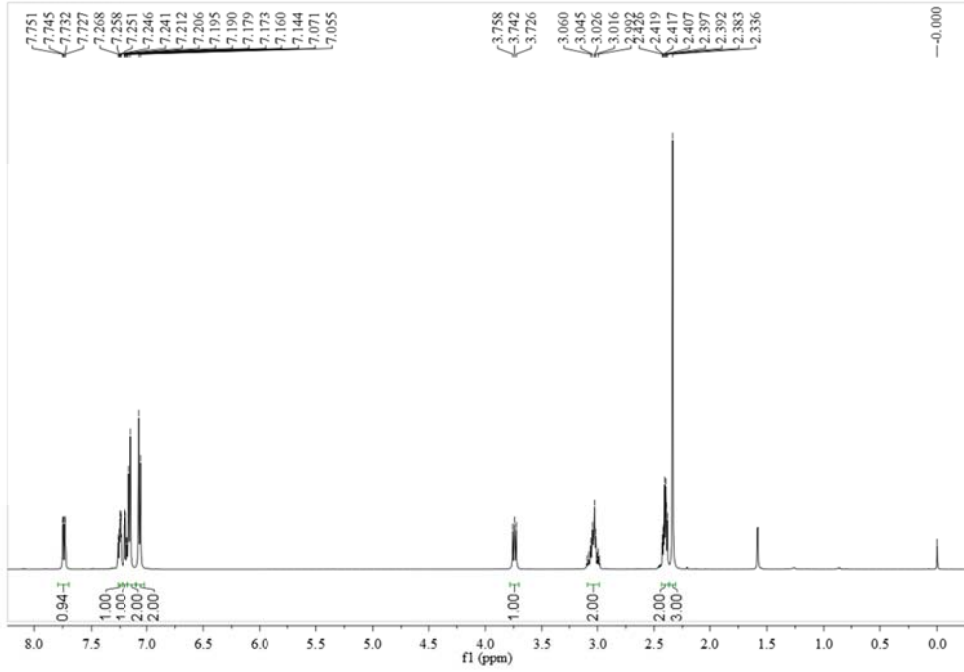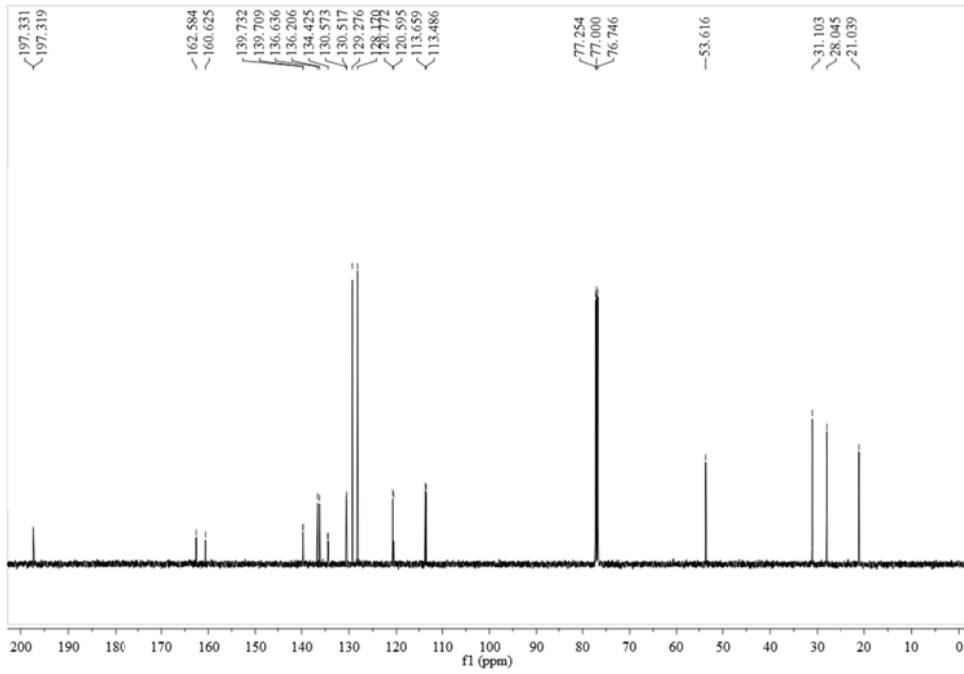

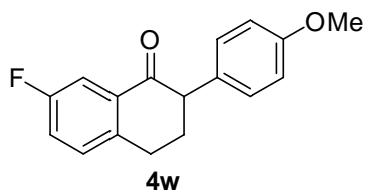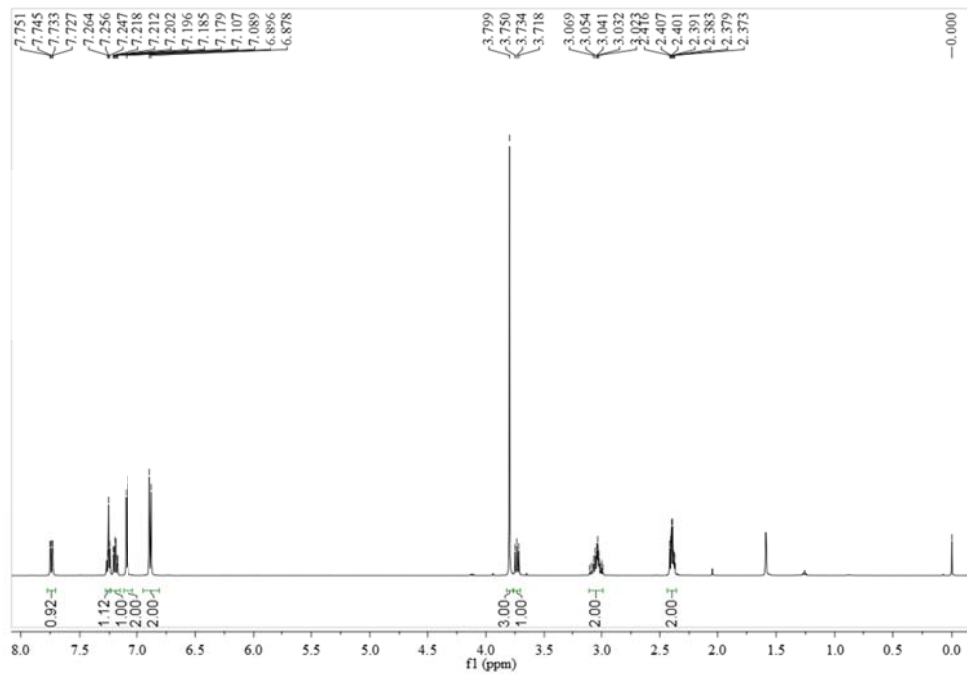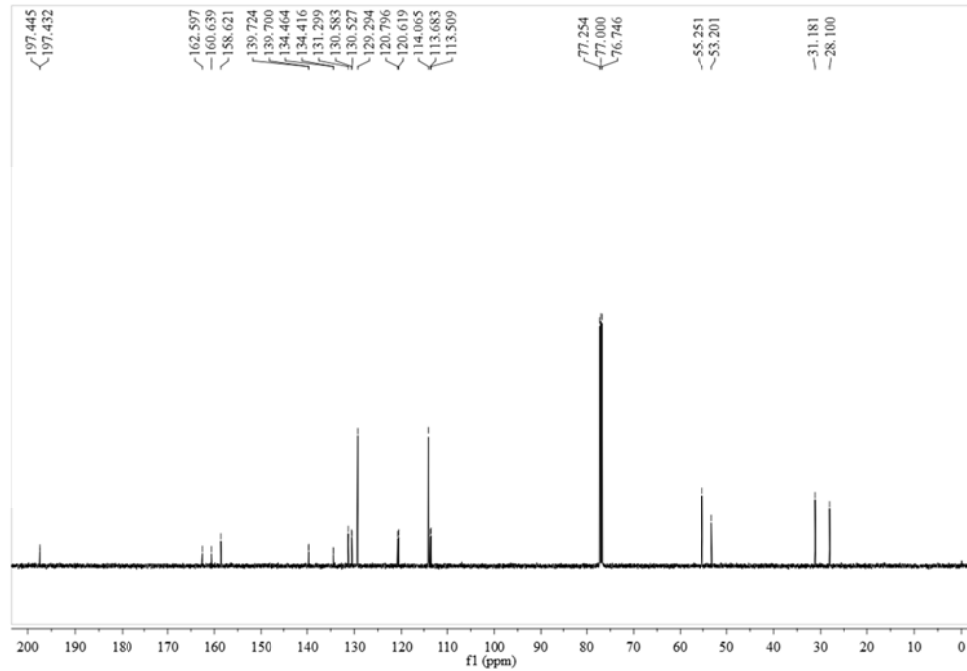



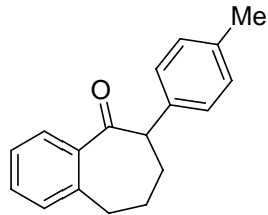

4x

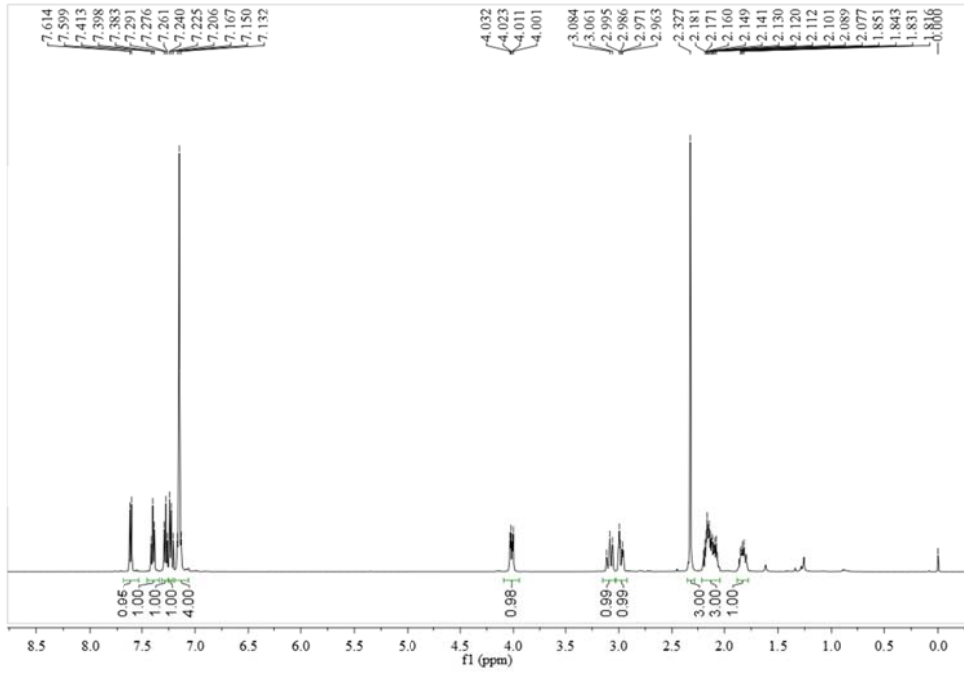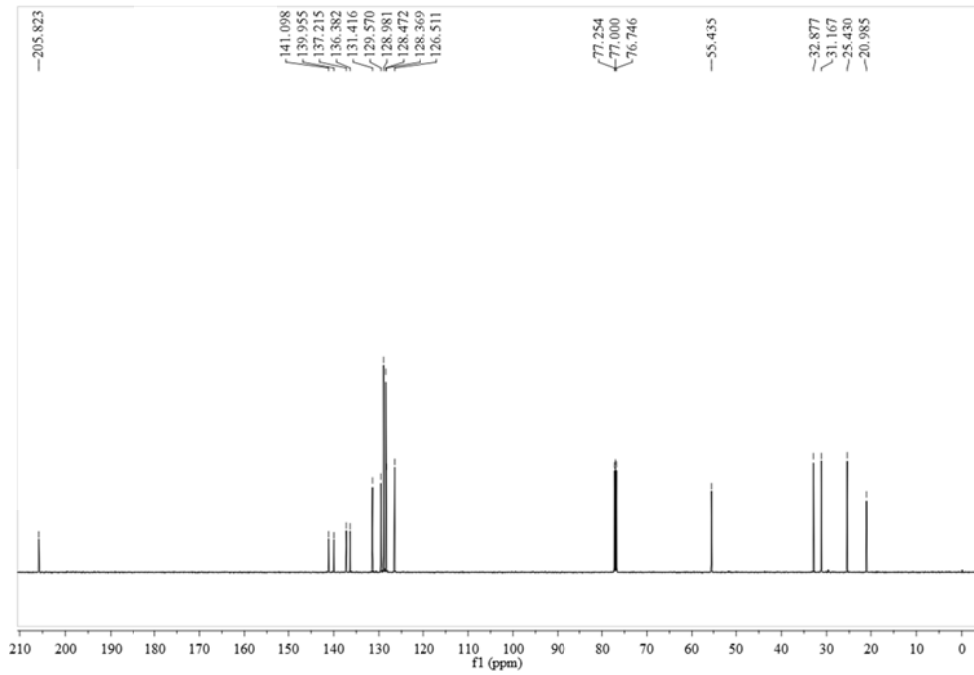

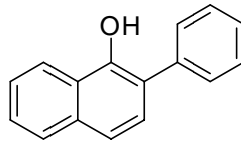

5a

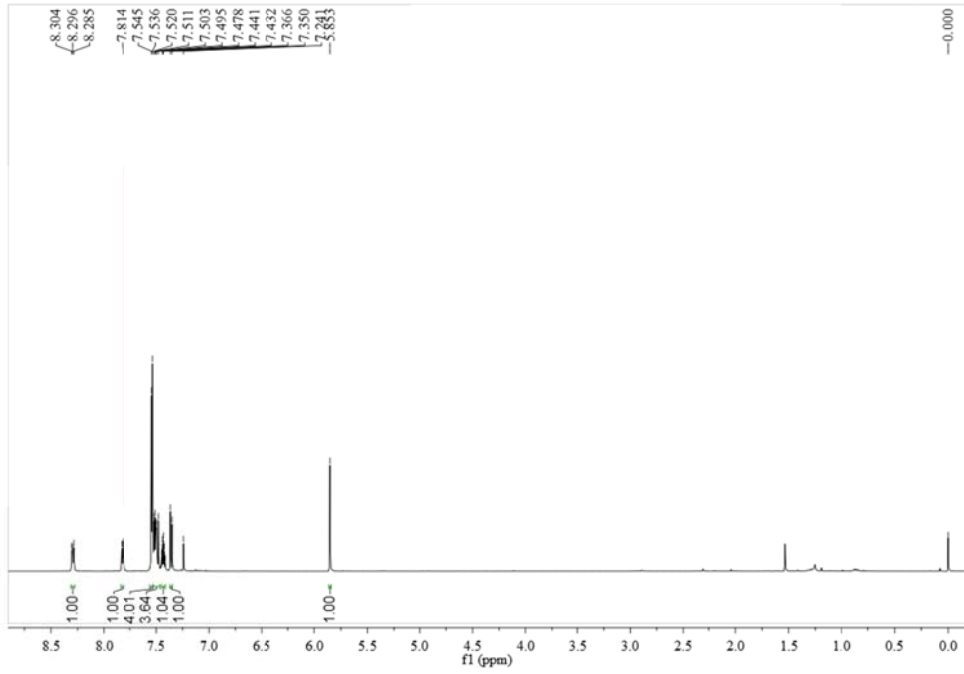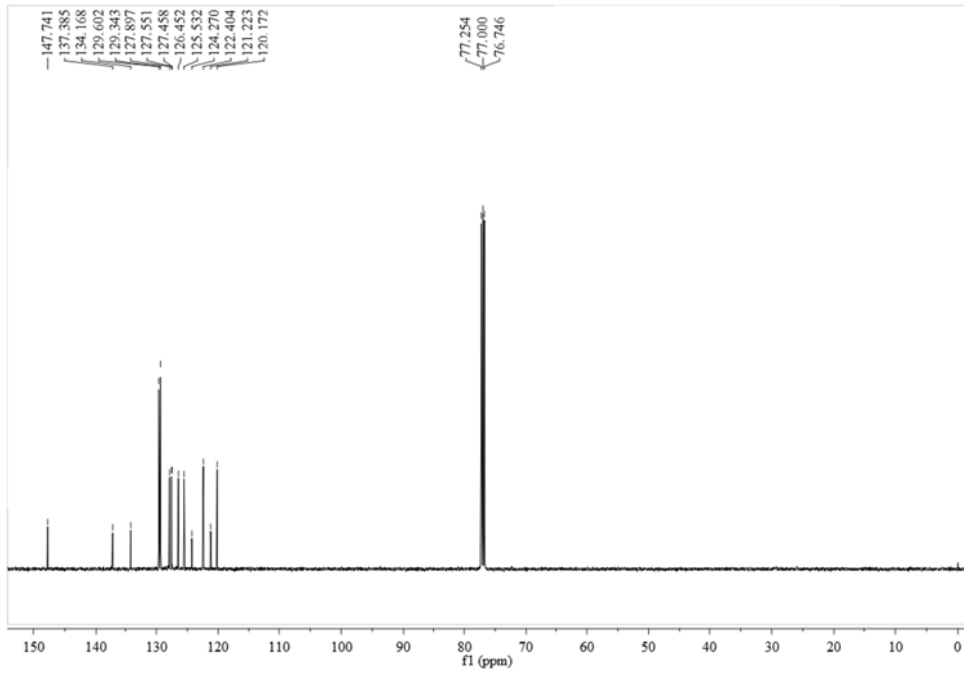

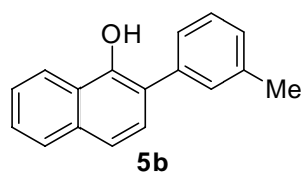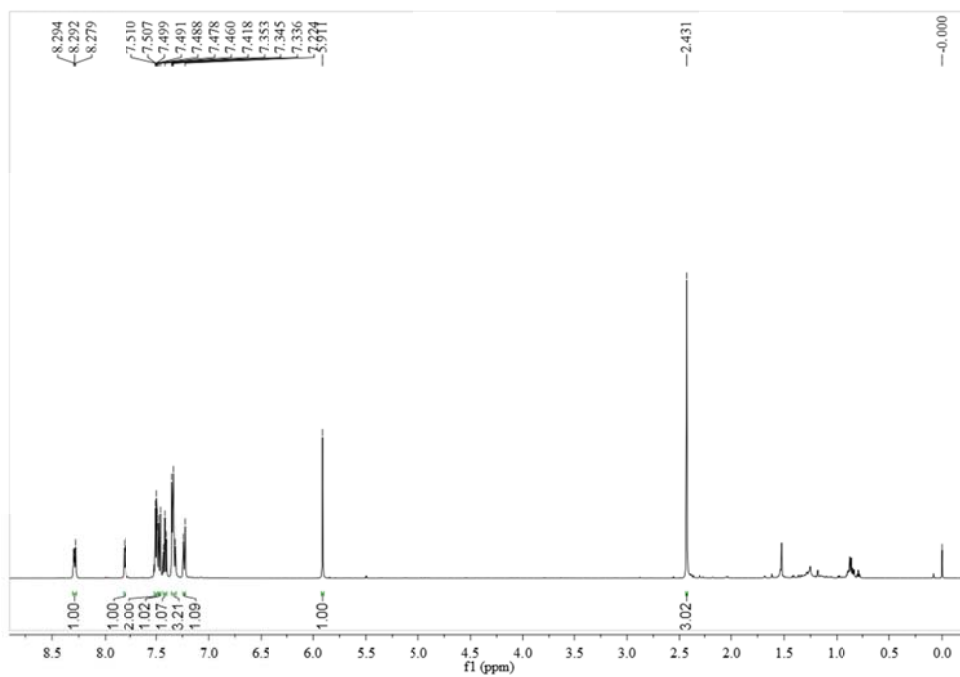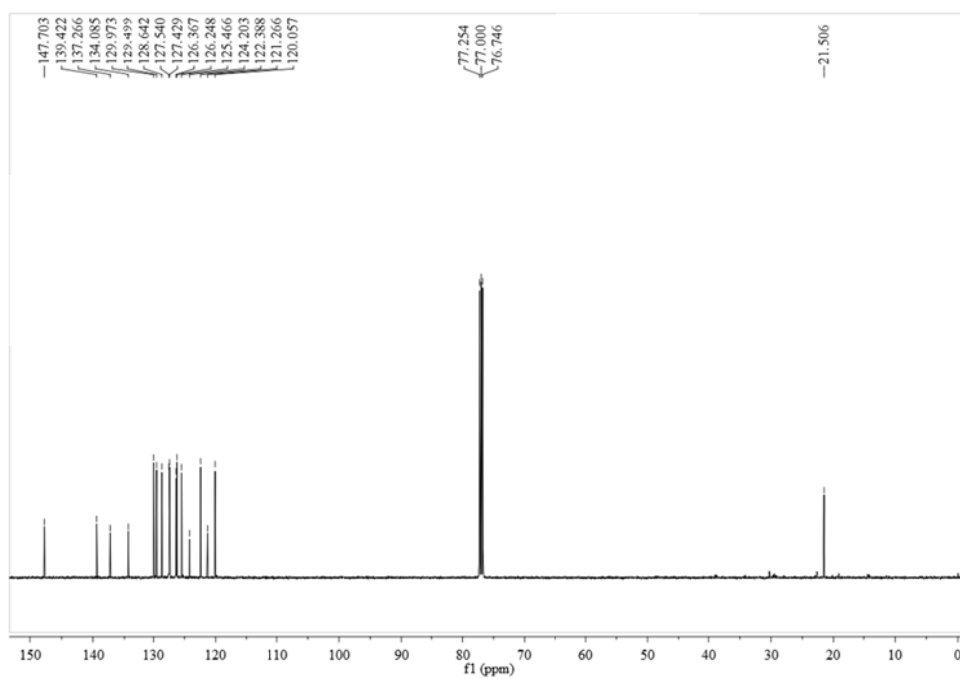

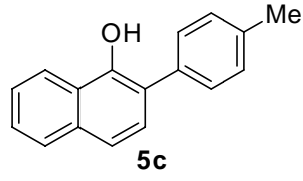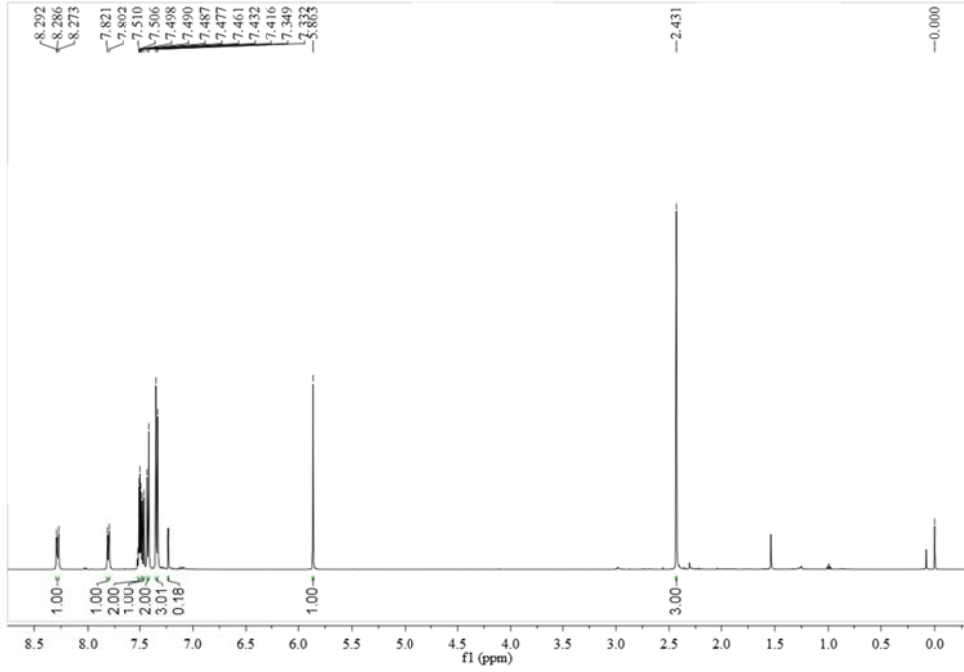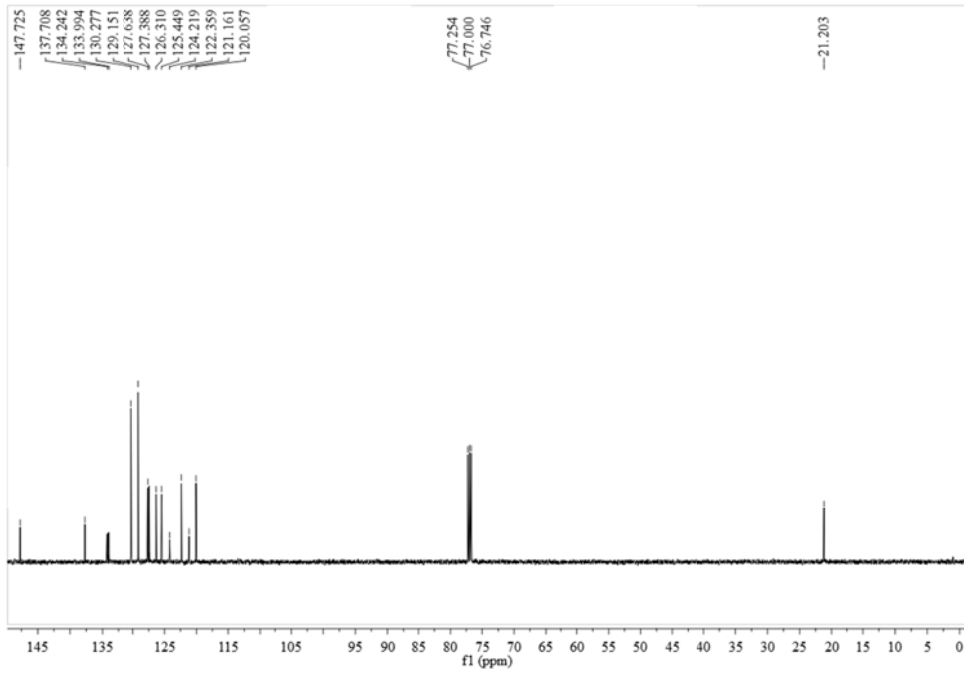

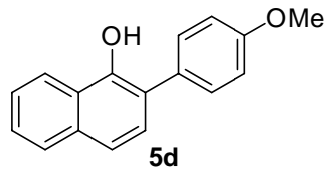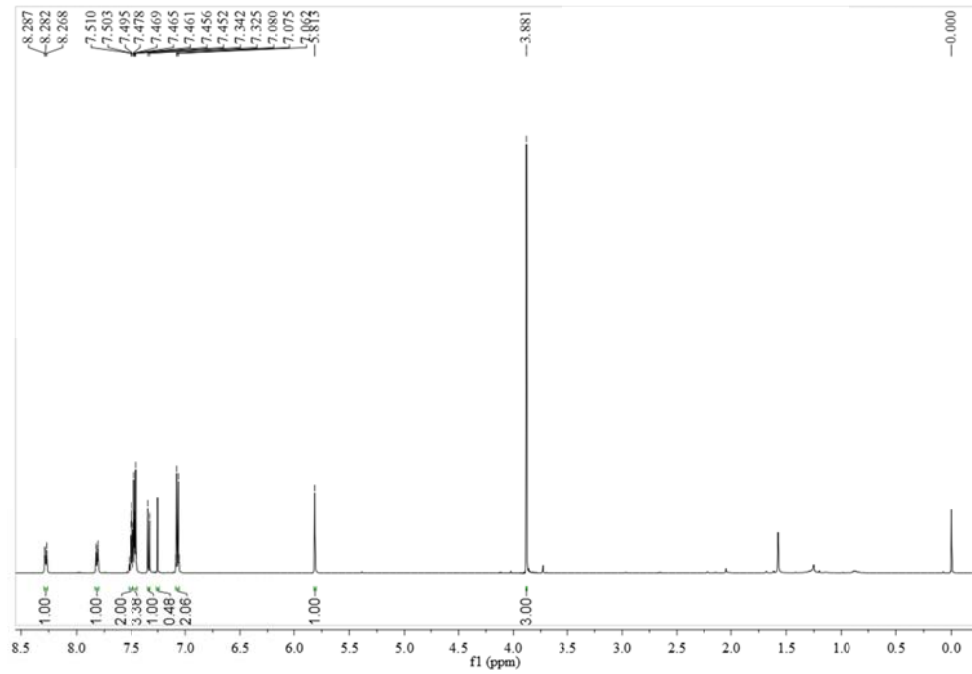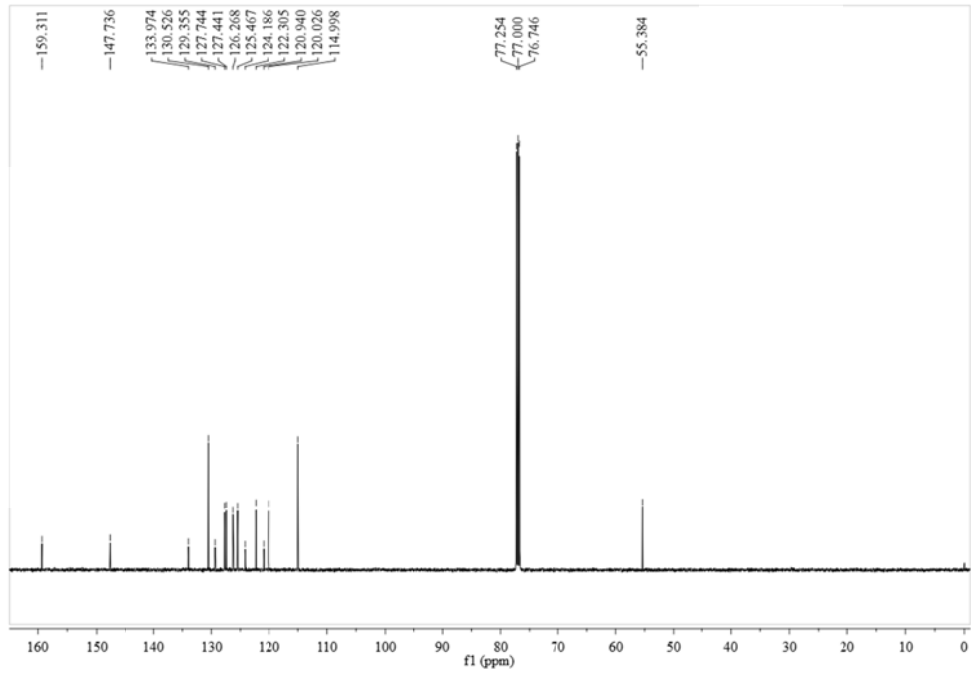

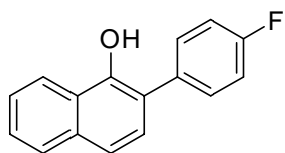

**5e**

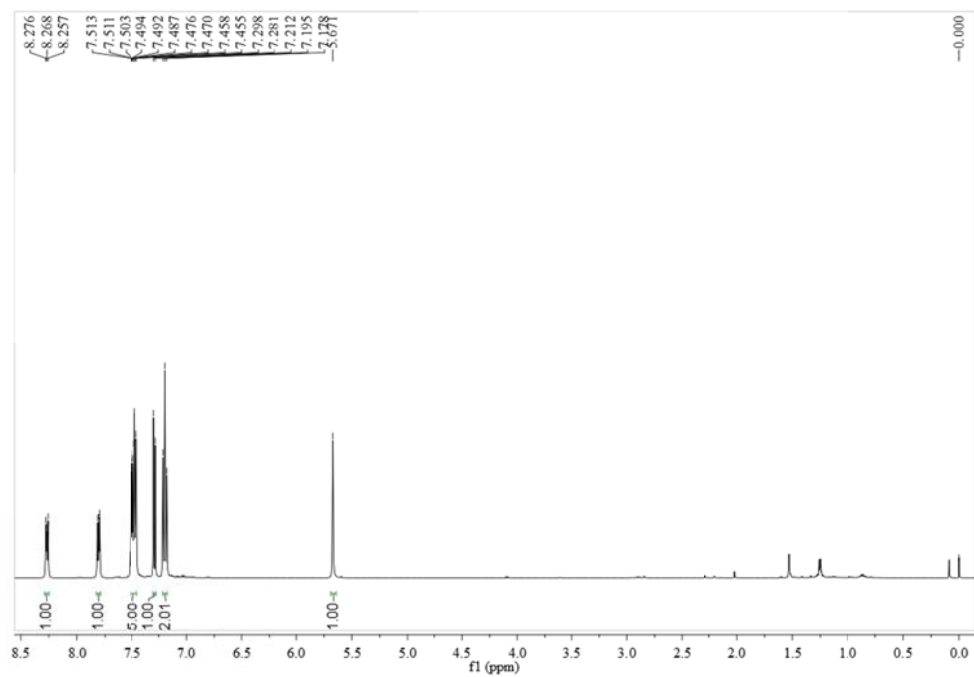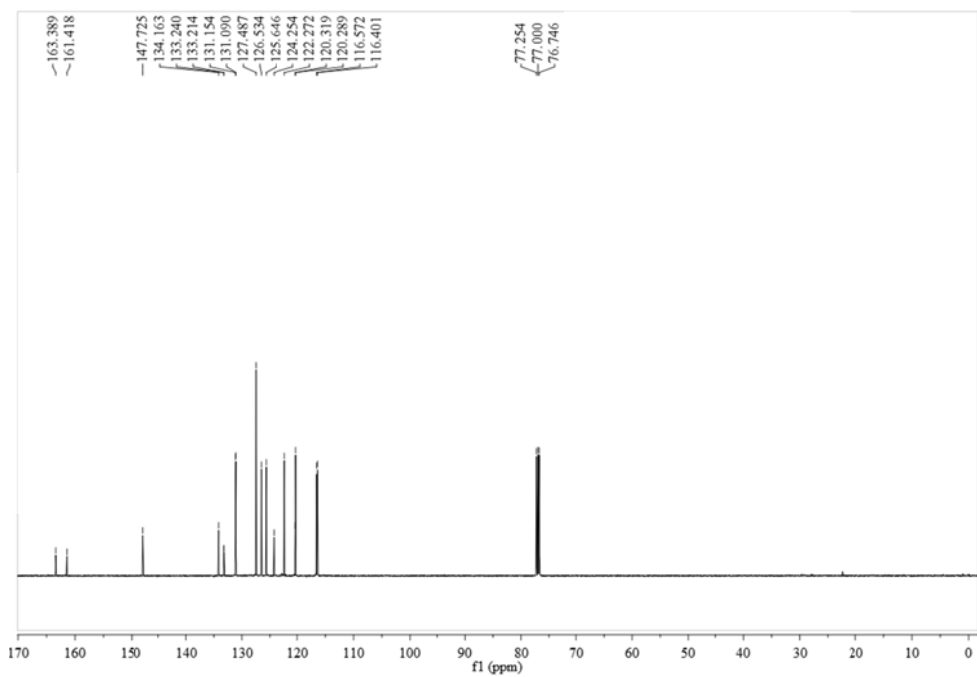

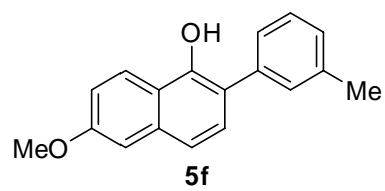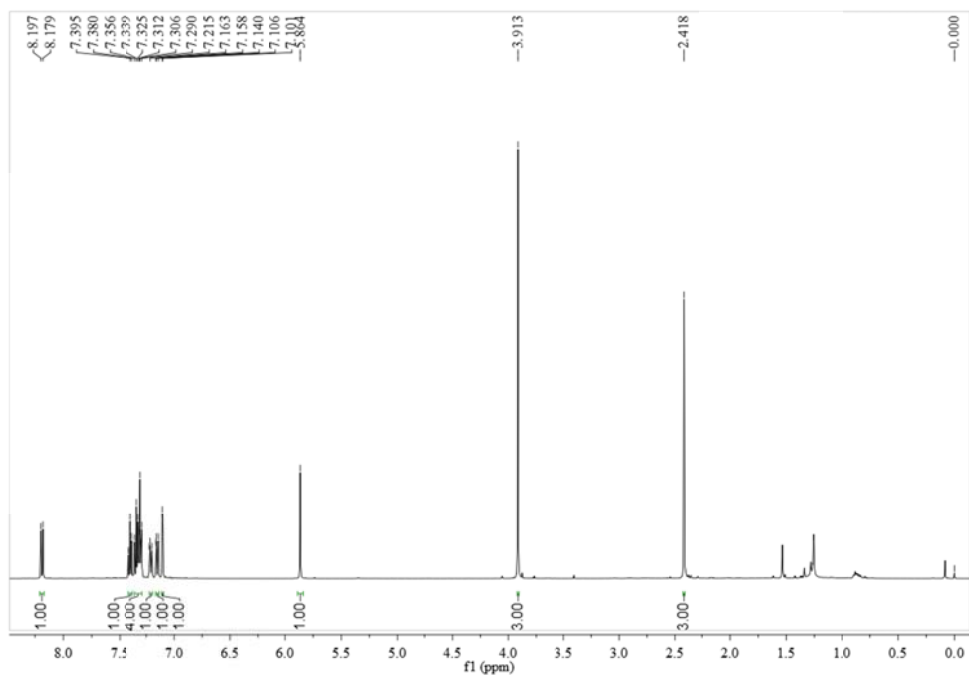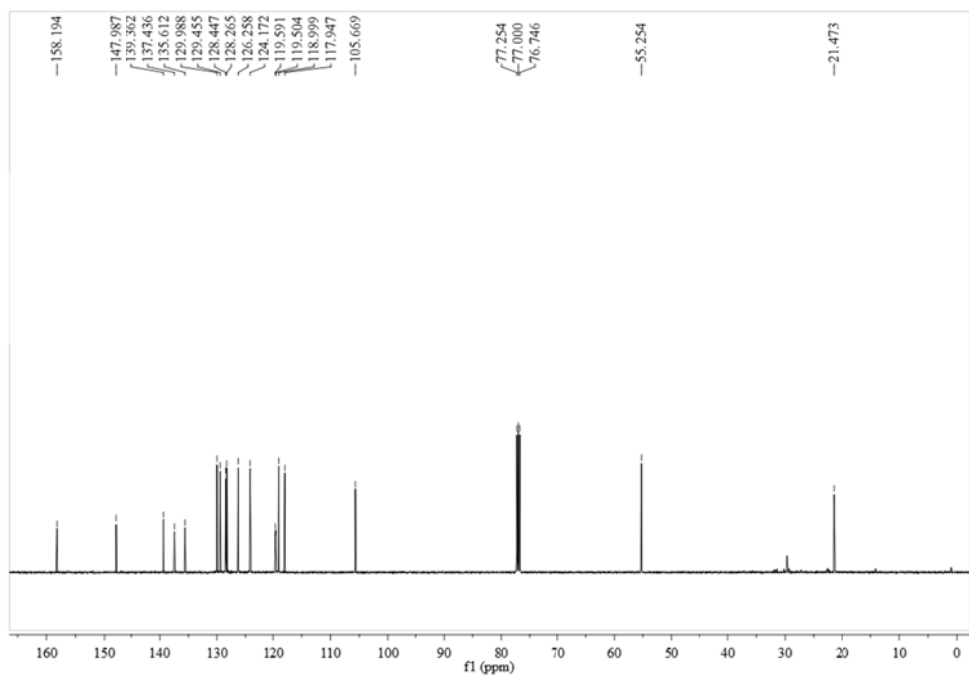

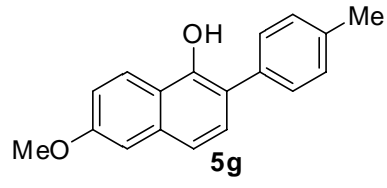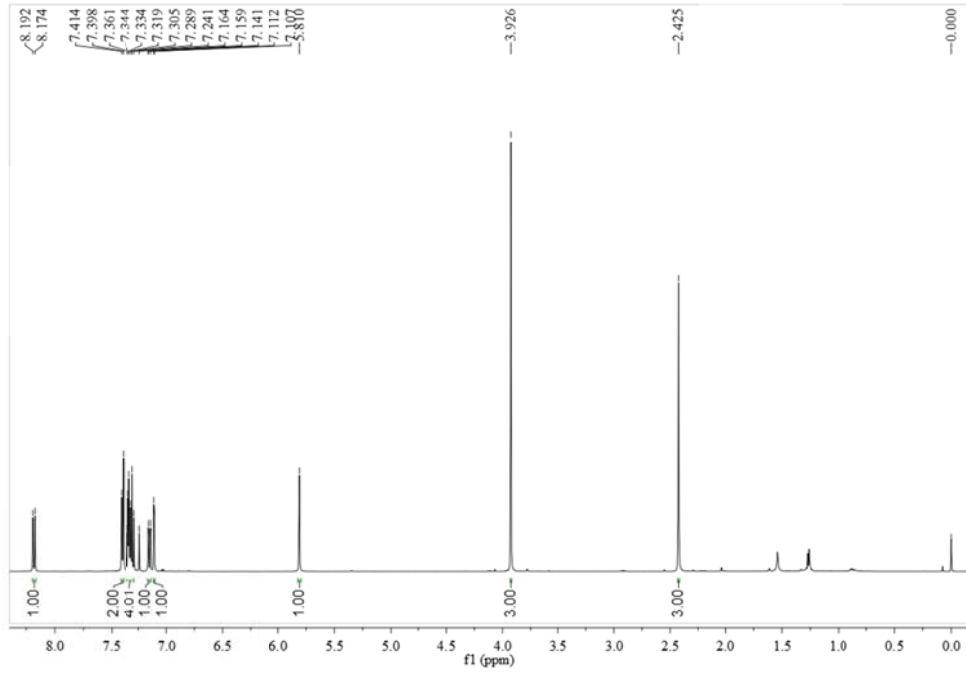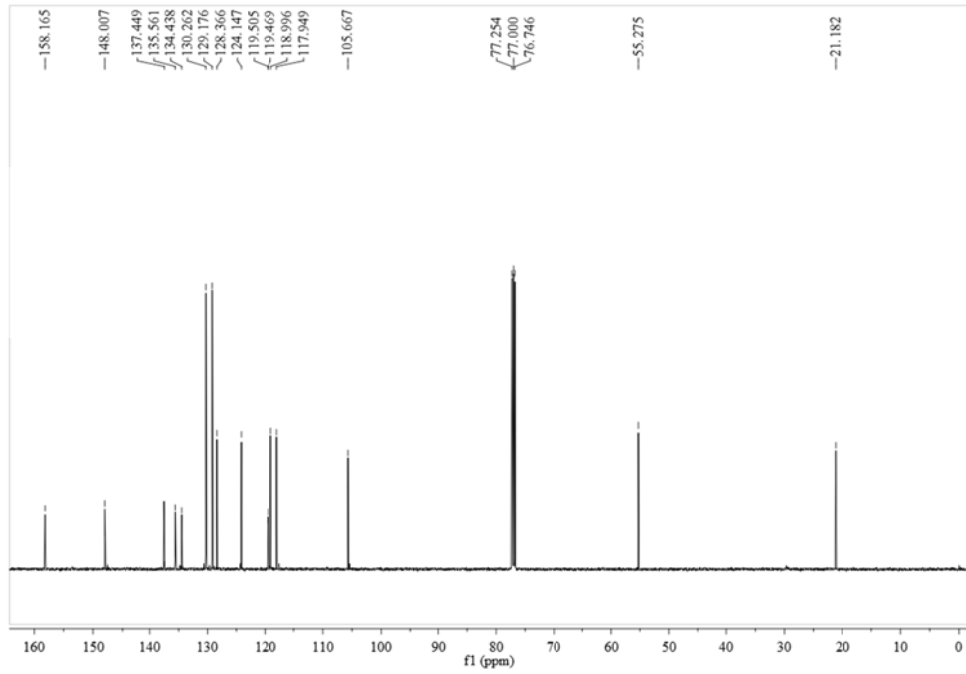



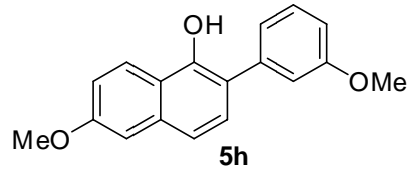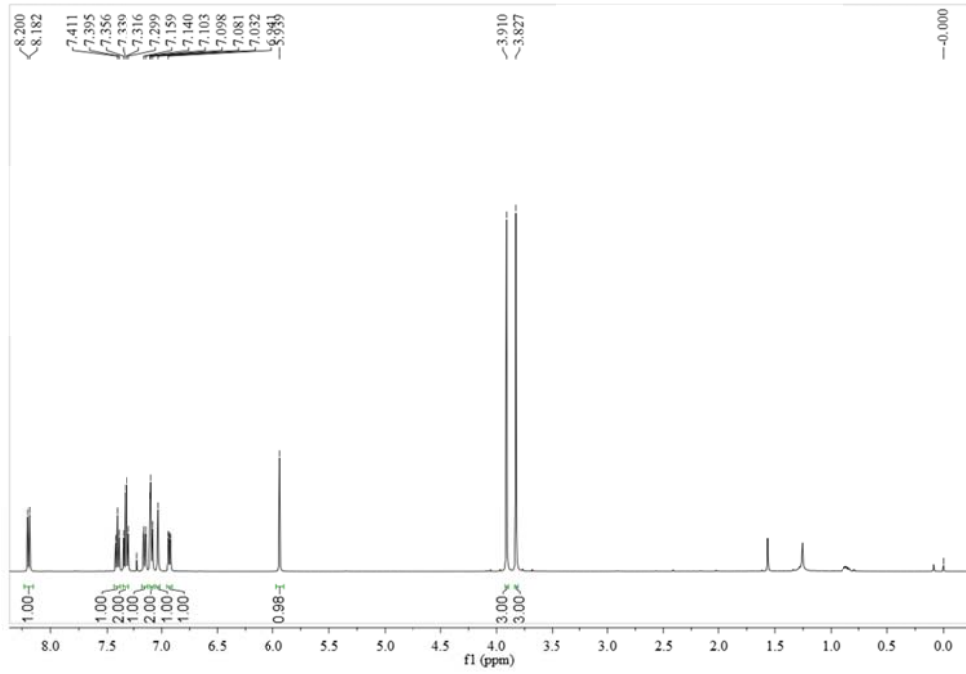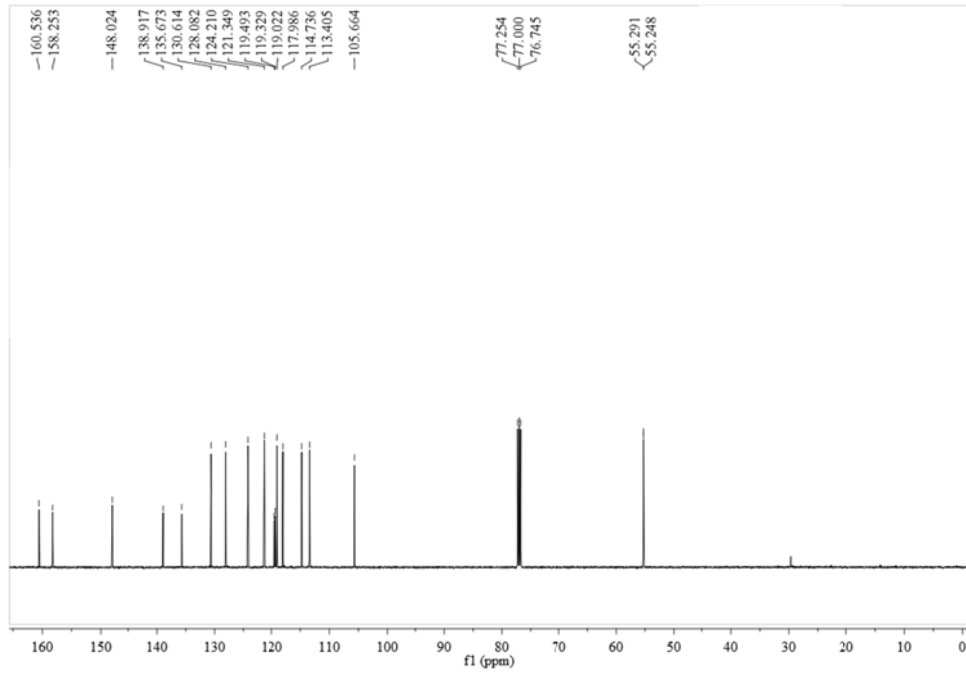

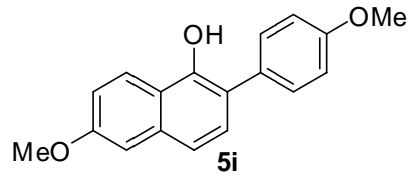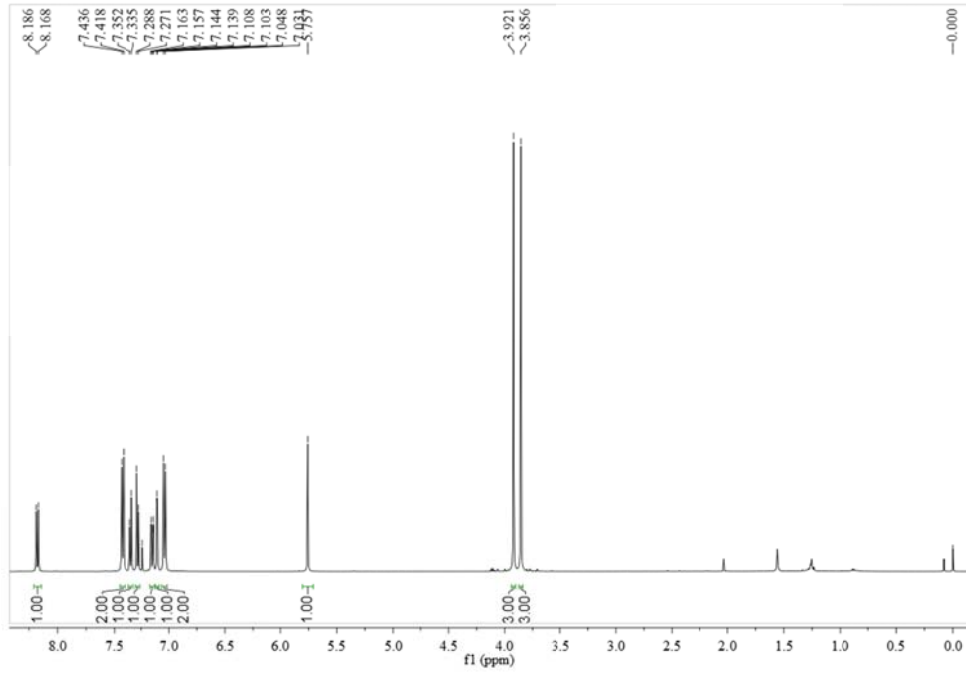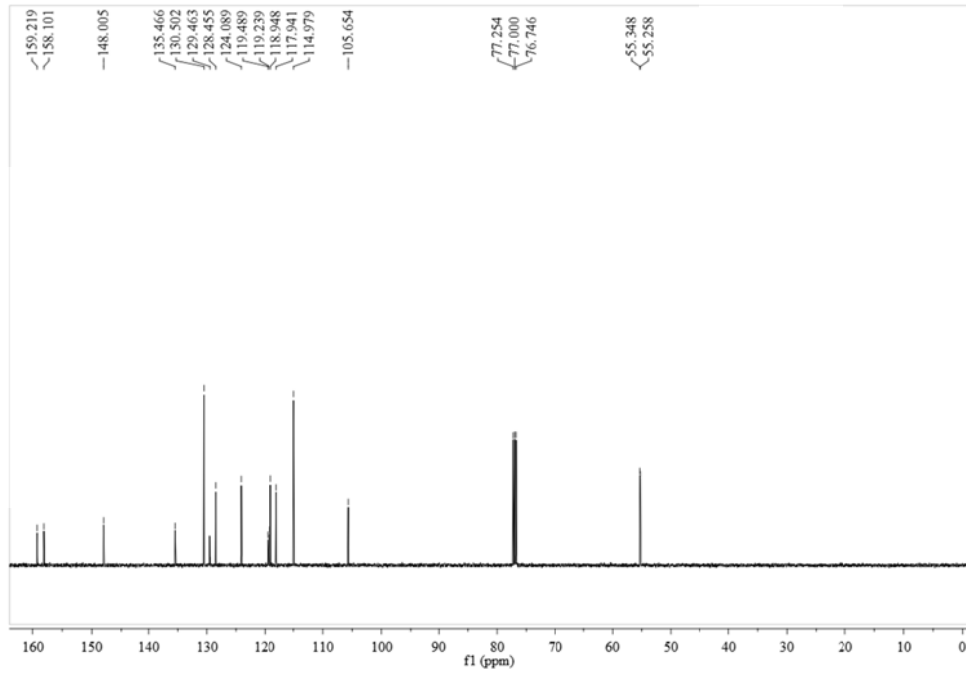

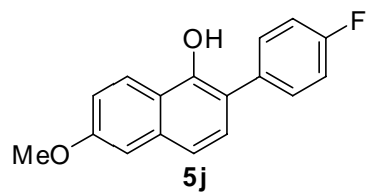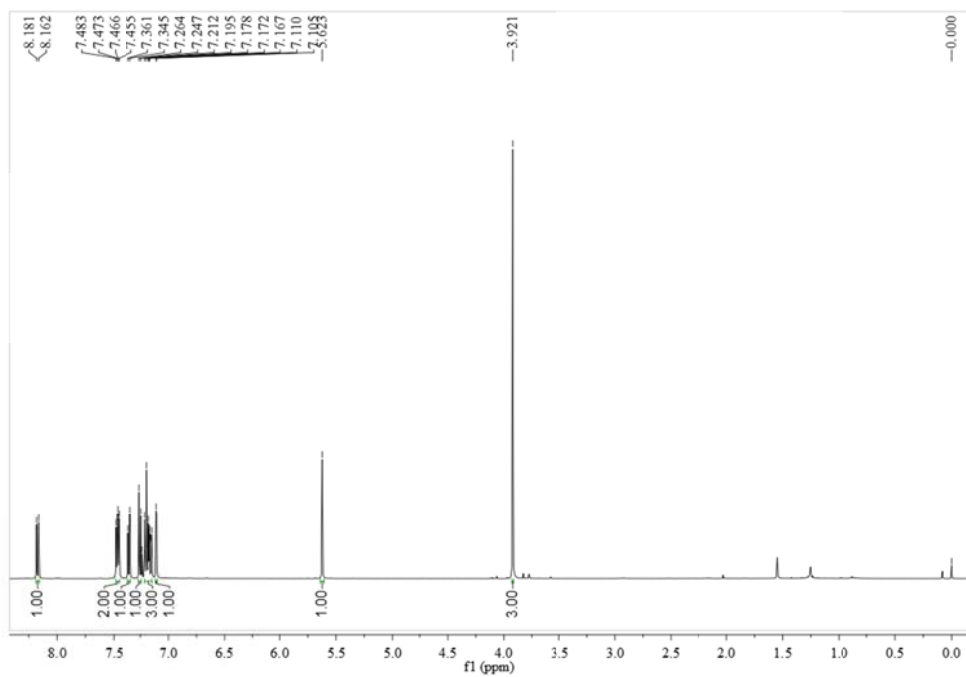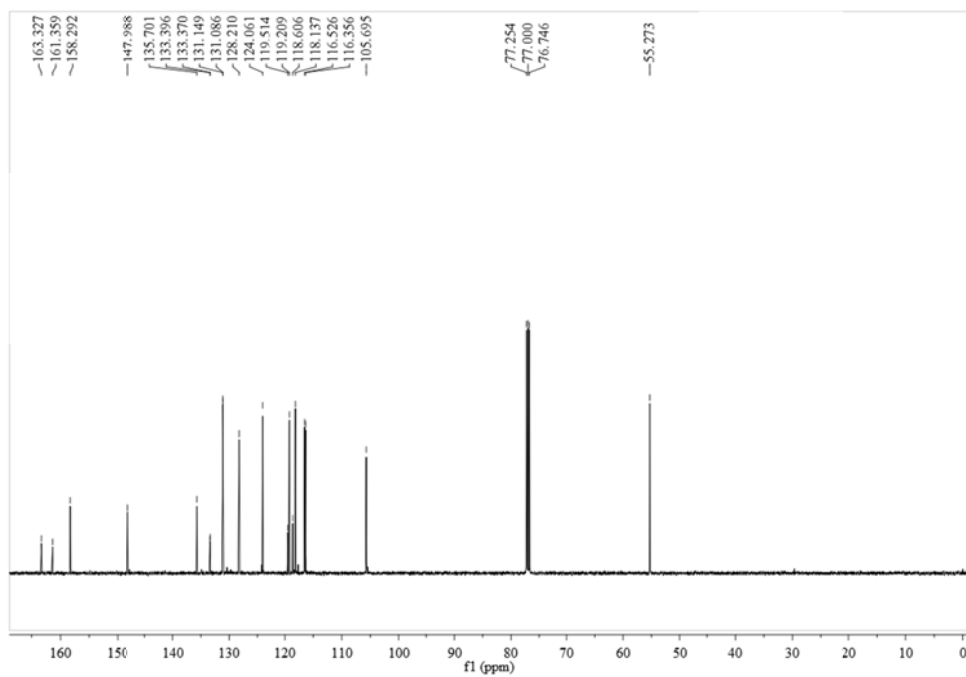

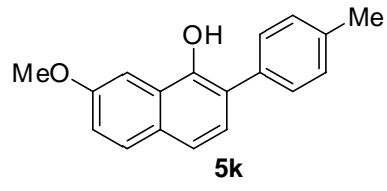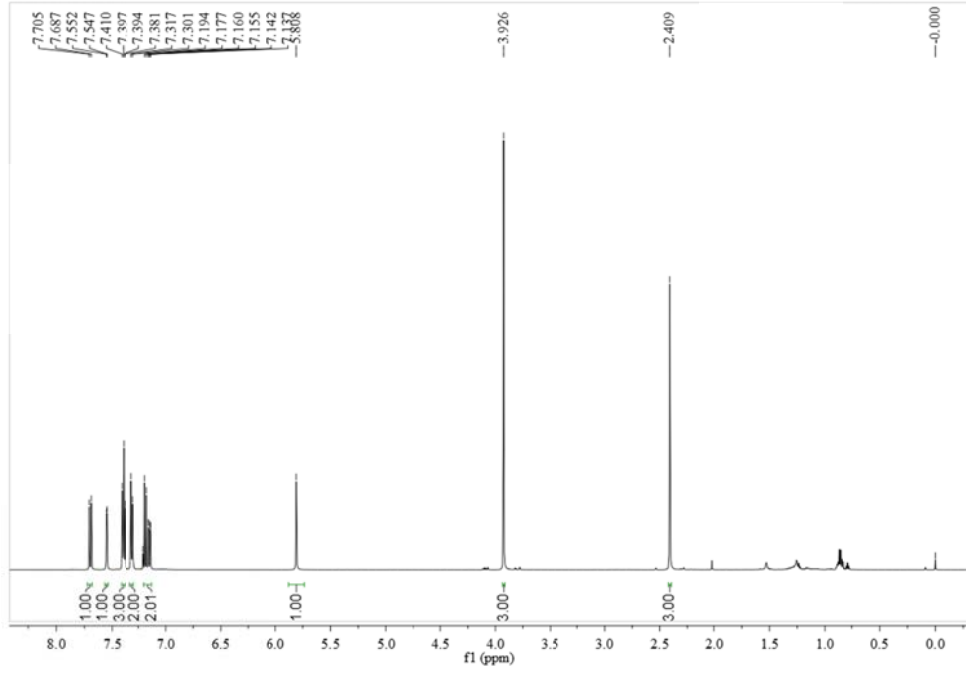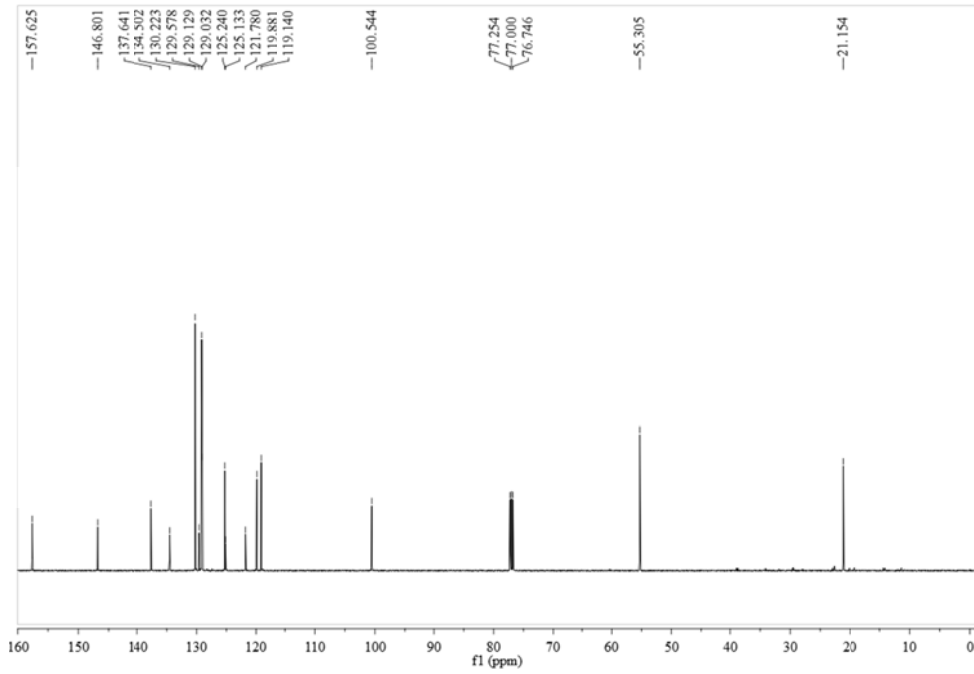

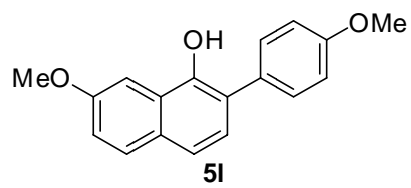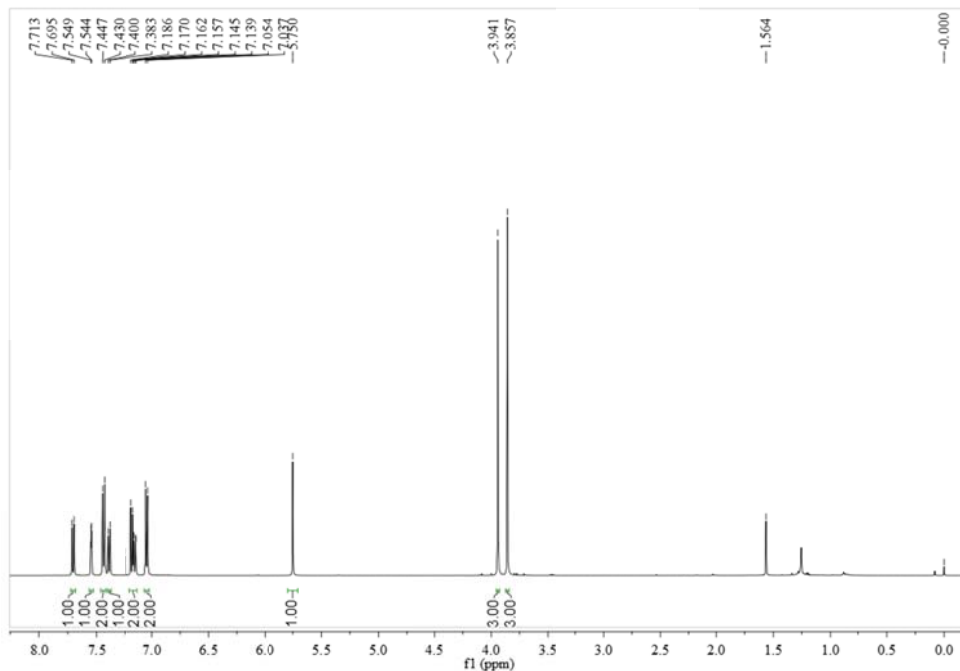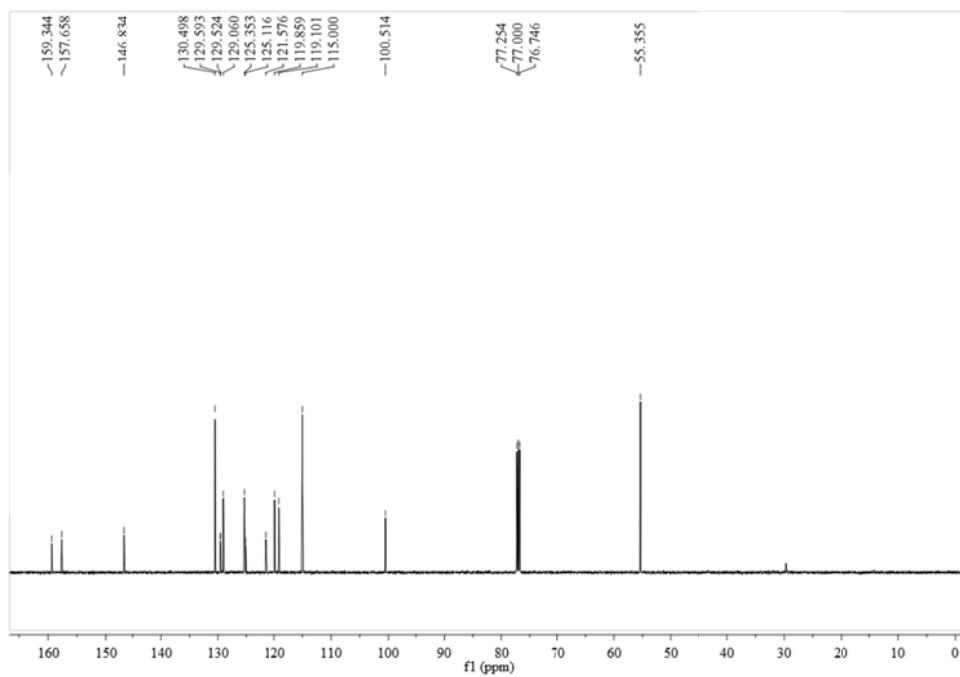

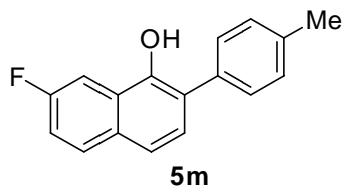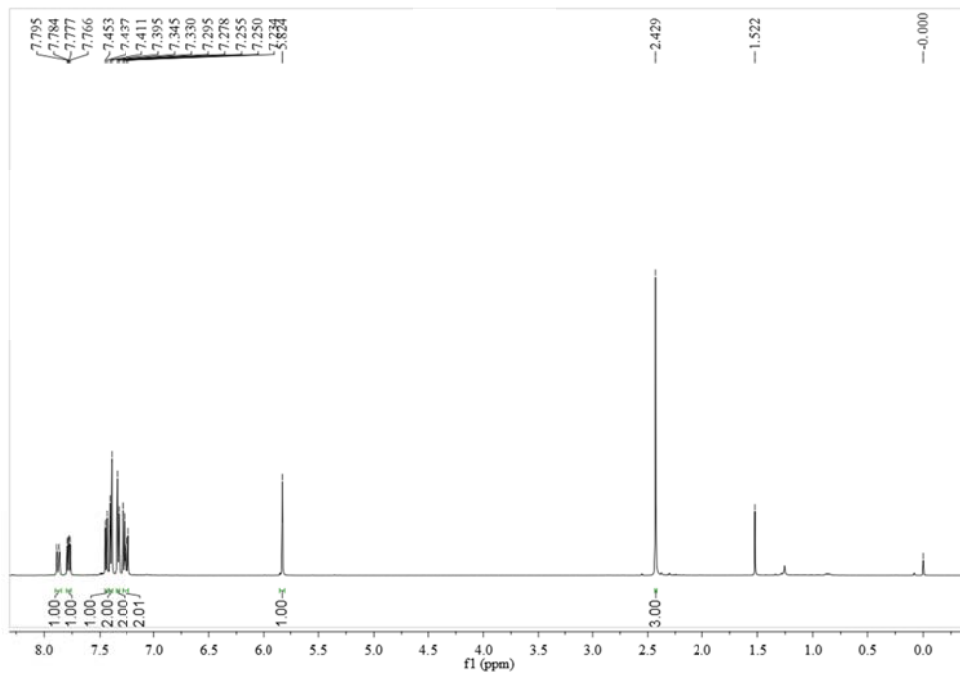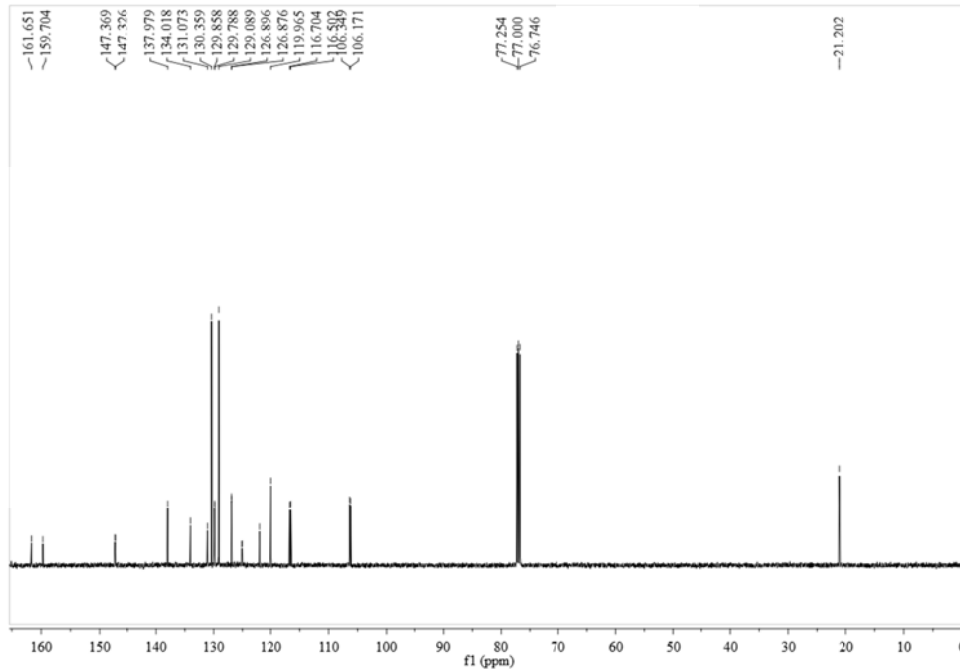

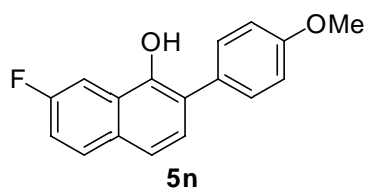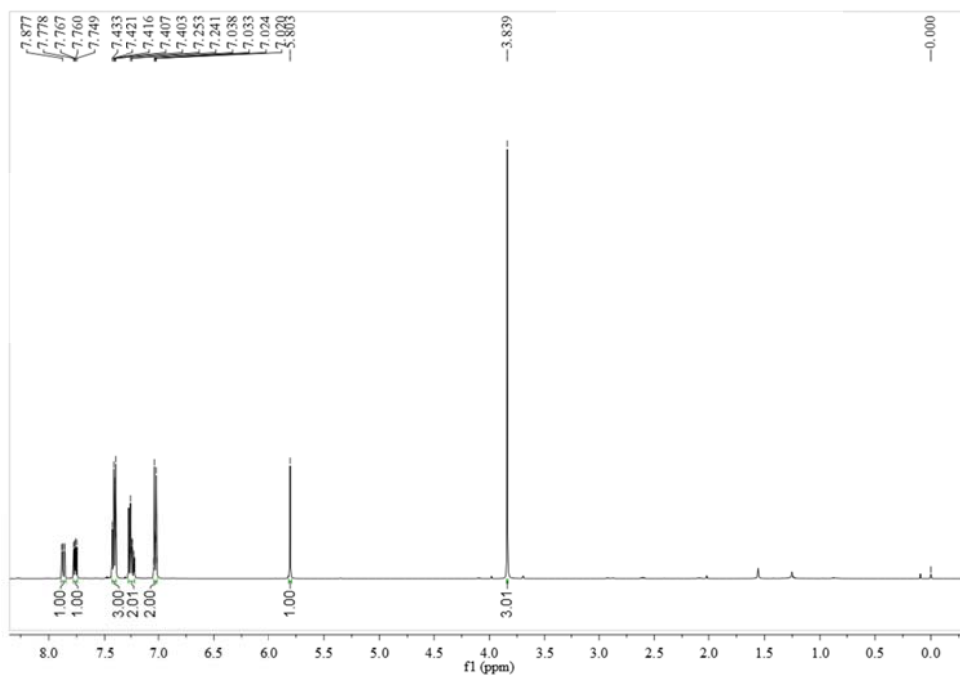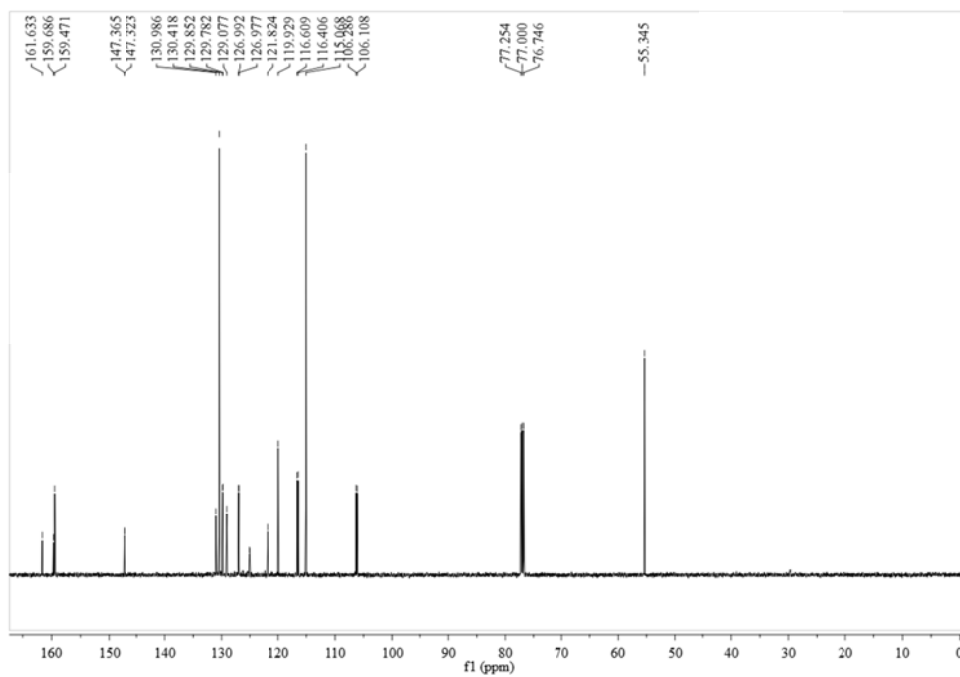

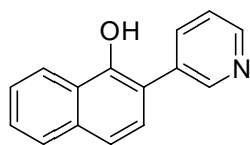

5o

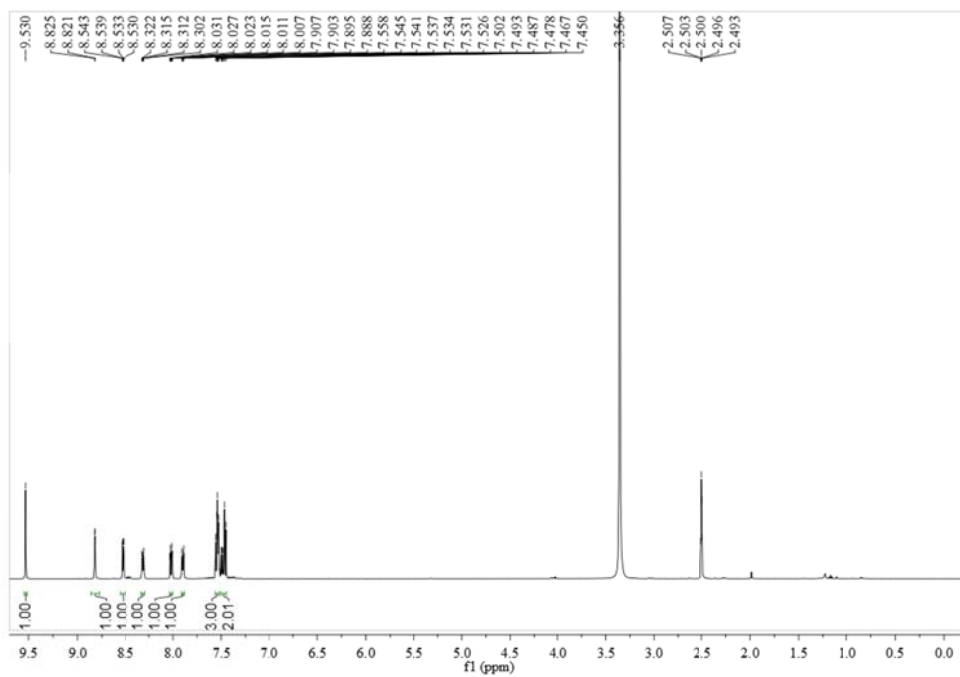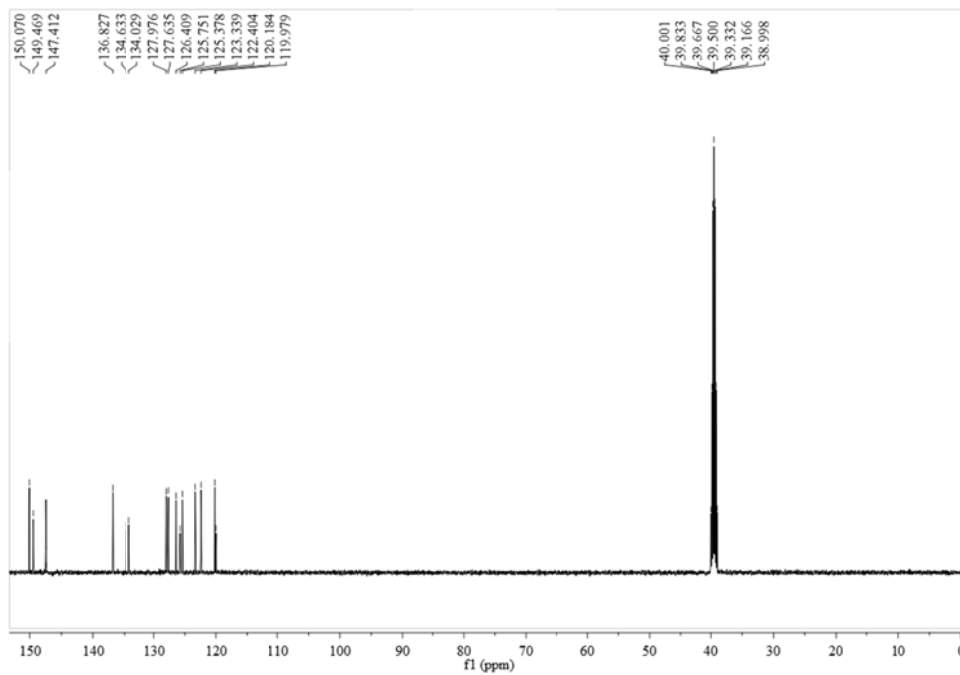



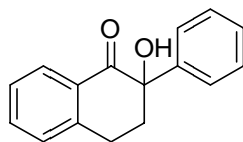

**6a**

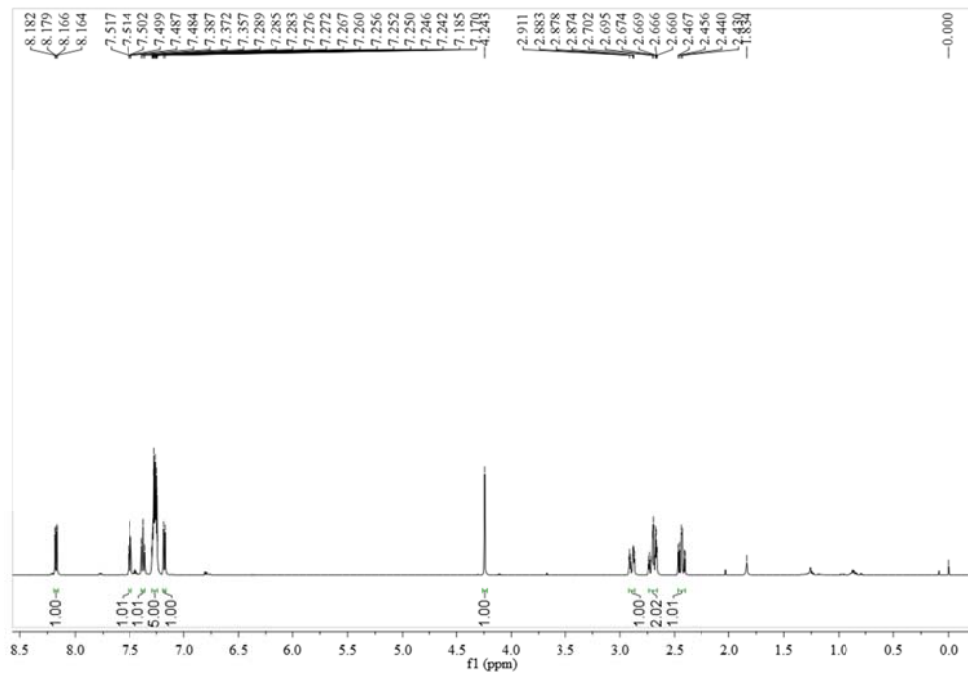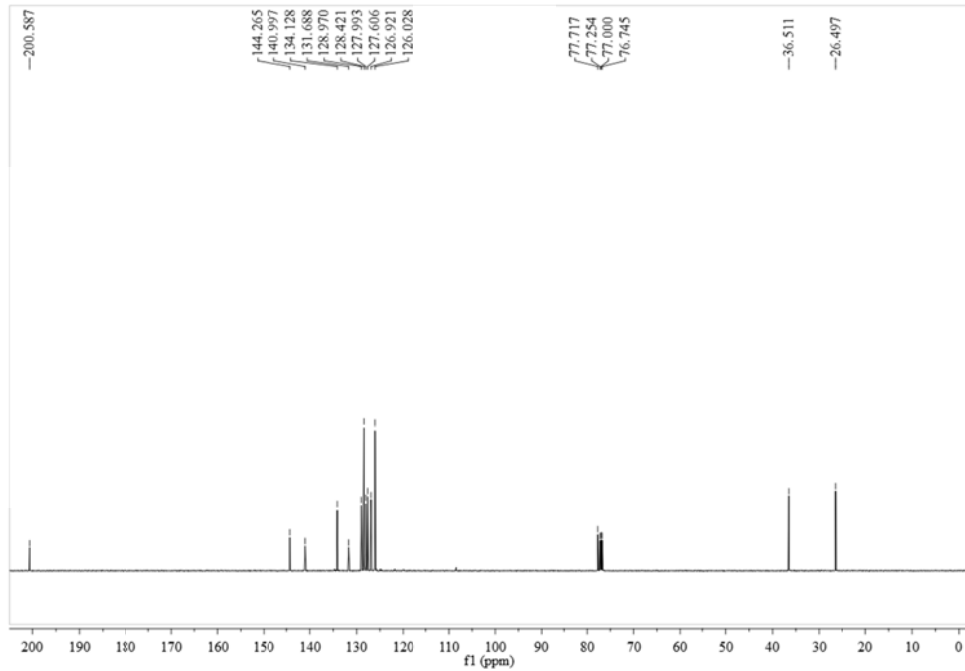

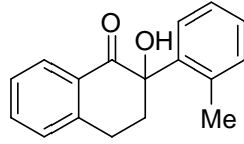

**6b**

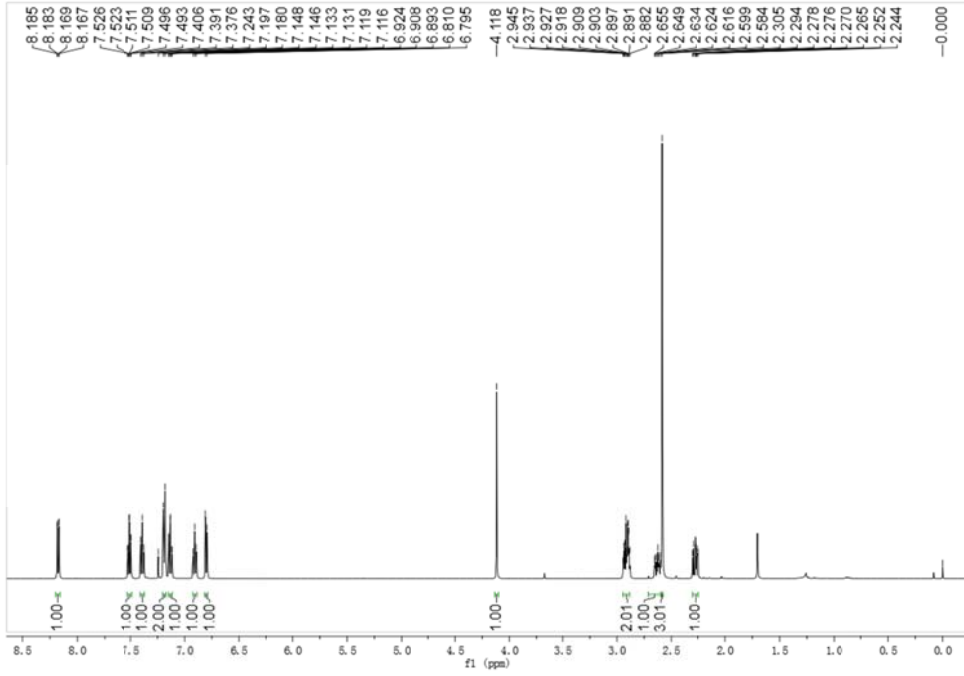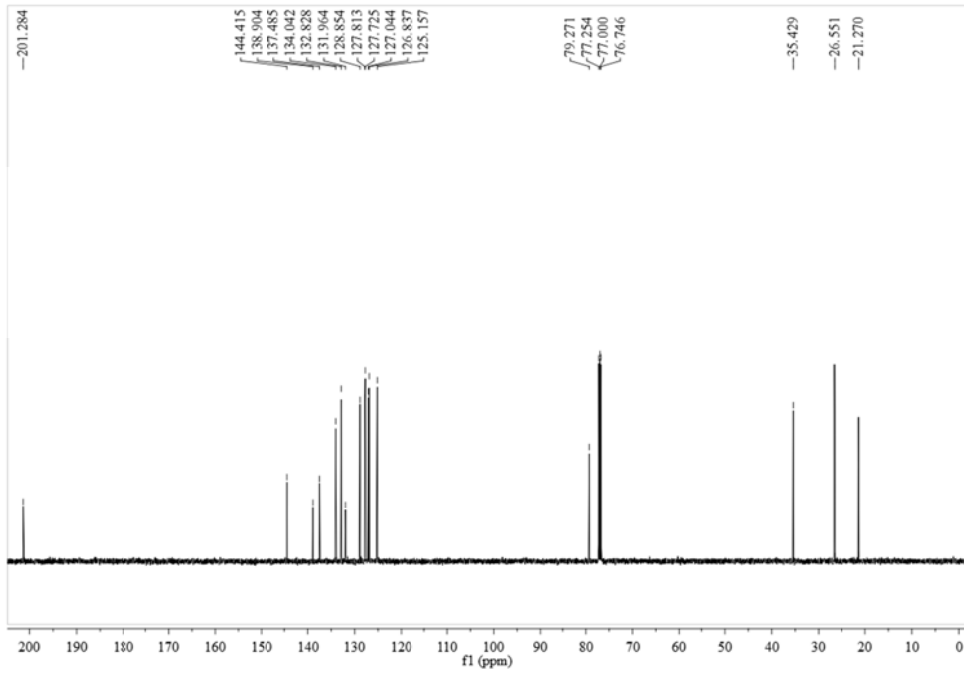

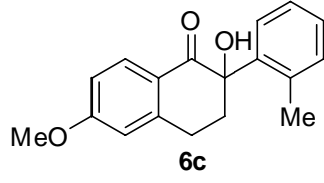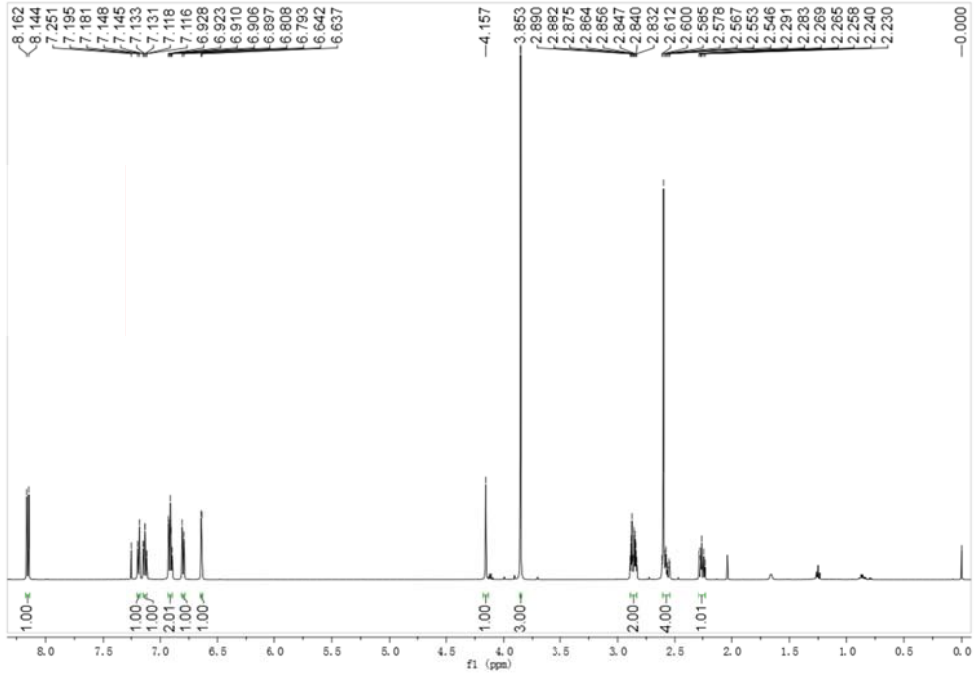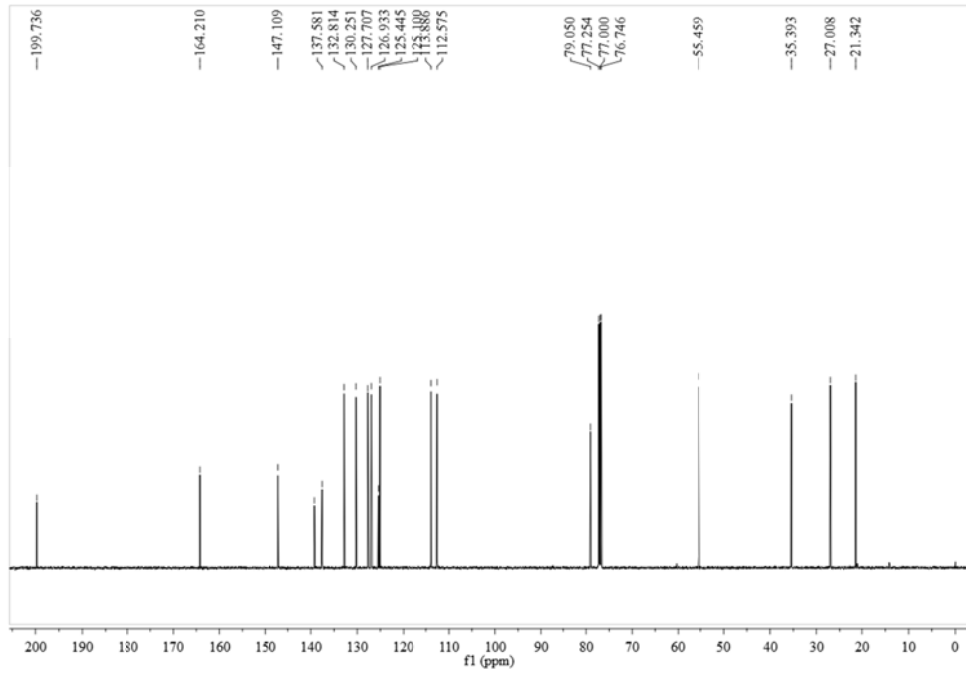

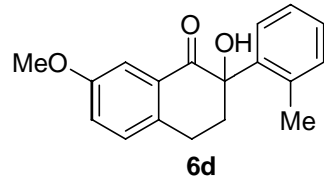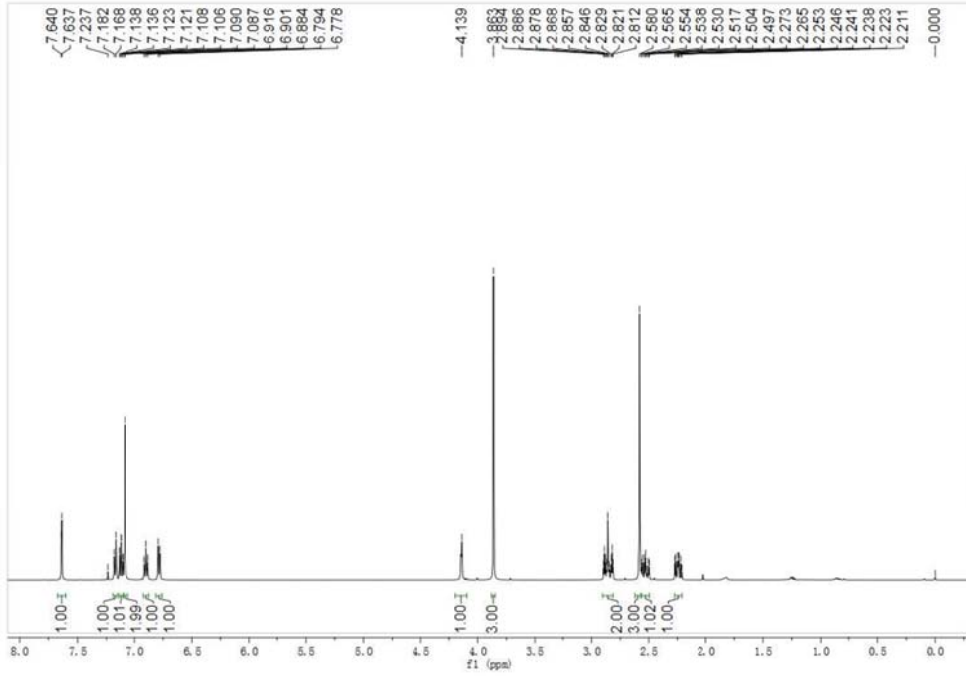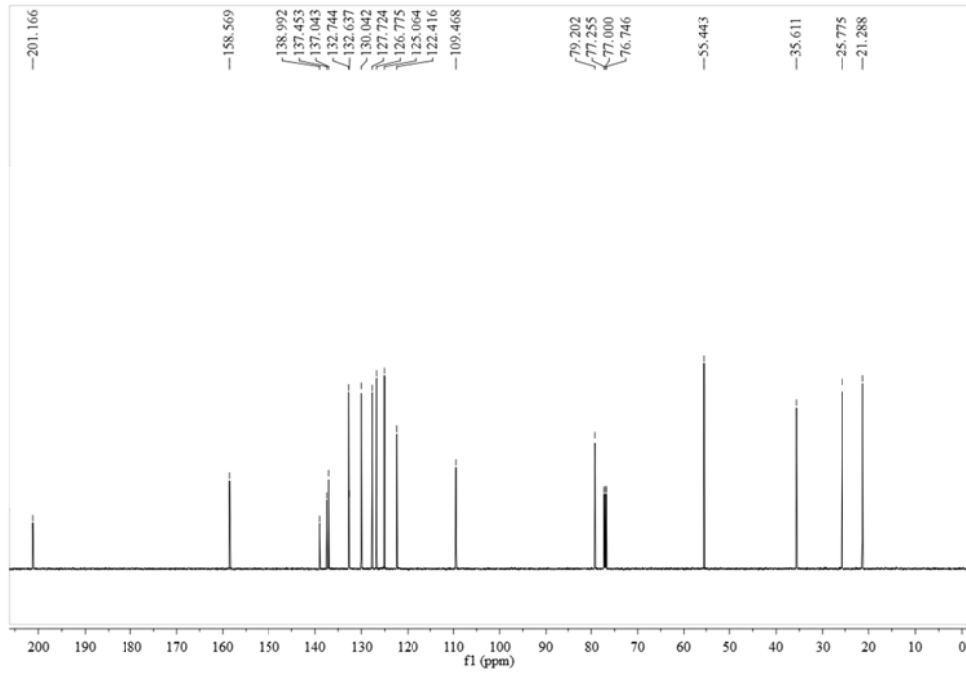

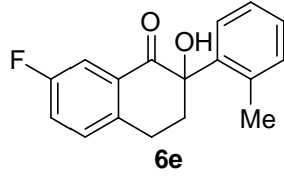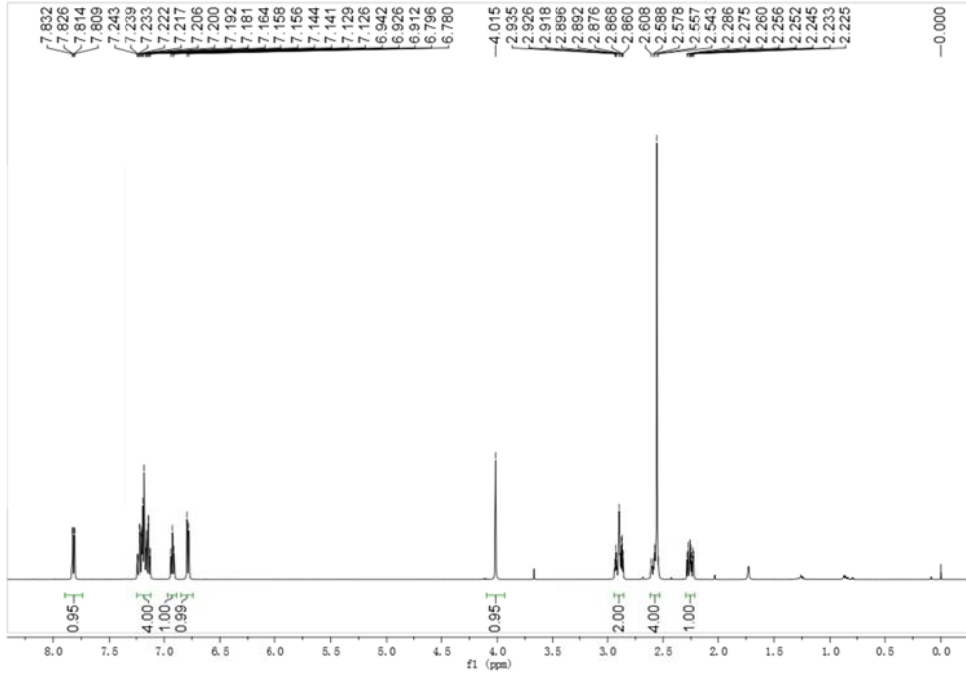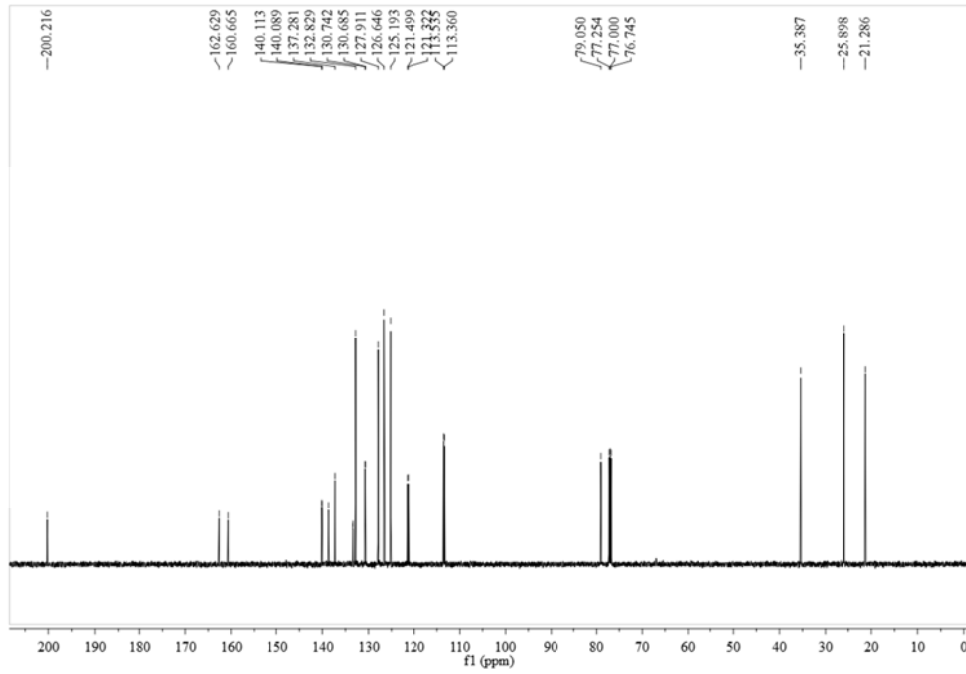

Supplement: c5ob01203a1.pdf [file c5ob01203a1.pdf]
